1 **Title**

2 NASA GeneLab RNA-Seq Consensus Pipeline: Standardized Processing of Short-Read RNA-  
3 Seq Data

4 **Authors/Affiliations**

5 Eliah G. Overbey<sup>‡,1</sup>, Amanda M. Saravia-Butler<sup>‡,2,3</sup>, Zhe Zhang<sup>4</sup>, Komal S. Rathi<sup>4</sup>, Homer  
6 Fogle<sup>5,3</sup>, Willian A. da Silveira<sup>6</sup>, Richard J. Barker<sup>7</sup>, Joseph J. Bass<sup>8</sup>, Afshin Beheshti<sup>37,38</sup>, Daniel  
7 C. Berrios<sup>39</sup>, Elizabeth A. Blaber<sup>9</sup>, Egle Cekanaviciute<sup>3</sup>, Helio A. Costa<sup>10</sup>, Laurence B. Davin<sup>11</sup>,  
8 Kathleen M. Fisch<sup>12</sup>, Samrawit G. Gebre<sup>3,37</sup>, Matthew Geniza<sup>13</sup>, Rachel Gilbert<sup>14</sup>, Simon Gilroy<sup>7</sup>,  
9 Gary Hardiman<sup>6,15</sup>, Raúl Herranz<sup>16</sup>, Yared H. Kidane<sup>17</sup>, Colin P.S. Kruse<sup>18</sup>, Michael D. Lee<sup>19,20</sup>,  
10 Ted Liefeld<sup>21</sup>, Norman G. Lewis<sup>11</sup>, J. Tyson McDonald<sup>22</sup>, Robert Meller<sup>23</sup>, Tejaswini Mishra<sup>24</sup>,  
11 Imara Y. Perera<sup>25</sup>, Shayoni Ray<sup>26</sup>, Sigrid S. Reinsch<sup>3</sup>, Sara Brin Rosenthal<sup>12</sup>, Michael Strong<sup>27</sup>,  
12 Nathaniel J Szewczyk<sup>28</sup>, Candice G.T. Tahimic<sup>29</sup>, Deanne M. Taylor<sup>30</sup>, Joshua P. Vandenbrink<sup>31</sup>,  
13 Alicia Villacampa<sup>16</sup>, Silvio Weging<sup>32</sup>, Chris Wolverton<sup>33</sup>, Sarah E. Wyatt<sup>34,35</sup>, Luis Zea<sup>36</sup>,  
14 Sylvain V. Costes<sup>\*,3</sup>, Jonathan M. Galazka<sup>\*,3</sup>

15 1: Department of Genome Sciences, University of Washington, Seattle, WA, 98195, USA

16 2: Logyx, LLC, Mountain View, CA 94043, USA

17 3: Space Biosciences Division, NASA Ames Research Center, Moffett Field, CA 94035, USA

18 4: Department of Biomedical and Health Informatics, The Children's Hospital of Philadelphia,  
19 University of Pennsylvania, Philadelphia, 19104, USA

20 5: The Bionetics Corporation, NASA Ames Research Center; Moffett Field, CA, 94035, USA

21 6: Institute for Global Food Security (IGFS) & School of Biological Sciences

22 Queen's University Belfast, UK

23 7: Department of Botany, University of Wisconsin, Madison, WI, 53706, USA

24 8: MRC Versus Arthritis Centre for Musculoskeletal Ageing Research, Royal Derby Hospital,

25 University of Nottingham & National Institute for Health Research Nottingham Biomedical

26 Research Centre, Derby, DE22 3DT, UK

- 27 9: Center for Biotechnology and Interdisciplinary Studies, Department of Biomedical  
28 Engineering, Rensselaer Polytechnic Institute, Troy, NY 12180, USA
- 29 10: Departments of Pathology, and of Biomedical Data Science, Stanford University School of  
30 Medicine, Stanford, CA, 94305, USA
- 31 11: Institute of Biological Chemistry, Washington State University, Pullman, WA, 99164, USA
- 32 12: Center for Computational Biology & Bioinformatics, Department of Medicine, University of  
33 California, San Diego, La Jolla, CA, 92037, USA
- 34 13: Phylos Bioscience, Portland, OR, 97214, USA
- 35 14: NASA Postdoctoral Program, Universities Space Research Association, NASA Ames  
36 Research Center, Moffett Field, CA, 94035, USA
- 37 15: Medical University of South Carolina, Charleston, SC, USA
- 38 16: Centro de Investigaciones Biológicas Margarita Salas (CSIC), Ramiro de Maeztu 9, 28040,  
39 Madrid, Spain
- 40 17: Center for Pediatric Bone Biology and Translational Research, Texas Scottish Rite Hospital  
41 for Children, 2222 Welborn St., Dallas, TX, 75219, USA
- 42 18: Los Alamos National Laboratory, Bioscience Division, Los Alamos, NM, 87545, USA
- 43 19: Exobiology Branch, NASA Ames Research Center, Mountain View, CA, 94035, USA
- 44 20: Blue Marble Space Institute of Science, Seattle, WA, 98154, USA
- 45 21: Department of Medicine, University of California San Diego, San Diego, CA, USA, 92093
- 46 22: Department of Radiation Medicine, Georgetown University Medical Center, Washington,  
47 DC, 20007, USA
- 48 23: Department of Neurobiology and Pharmacology, Morehouse School of Medicine, Atlanta,  
49 GA, 30310, USA
- 50 24: Department of Genetics, Stanford University School of Medicine, Stanford, CA, 94305, USA
- 51 25: Department of Plant and Microbial Biology, North Carolina State University, Raleigh NC,  
52 27695
- 53 26: NGM Biopharmaceuticals, South San Francisco, CA, 94080, USA
- 54 27: National Jewish Health, Center for Genes, Environment, and Health, 1400 Jackson Street,  
55 Denver, CO, 80206, USA
- 56 28: Ohio Musculoskeletal and Neurological Institute and Department of Biomedical Sciences,  
57 Ohio University, Athens, OH, 43147, USA

- 58 29: Department of Biology, University of North Florida, Jacksonville, Florida, 32224, USA  
59 30: Department of Biomedical and Health Informatics, Children's Hospital of Philadelphia and  
60 the Department of Pediatrics, Perelman School of Medicine, University of Pennsylvania,  
61 Philadelphia, 19104, USA  
62 31: Department of Biology, Louisiana Tech University, Ruston, LA, 71272, USA  
63 32: Institute of Computer Science, Martin-Luther University Halle-Wittenberg, Von-  
64 Seckendorff-Platz 1, Halle, 06120, Germany  
65 33: Department of Botany and Microbiology, Ohio Wesleyan University, Delaware, OH, USA  
66 34: Department of Environmental and Plant Biology, Ohio University, Athens, OH, 45701, USA  
67 35: Interdisciplinary Program in Molecular and Cellular Biology, Ohio University, Athens, OH,  
68 45701, USA  
69 36: BioServe Space Technologies, Aerospace Engineering Sciences Department, University of  
70 Colorado Boulder. 80303 USA  
71 37: KBR, NASA Ames Research Center; Moffett Field, CA, 94035, USA  
72 38: Stanley Center for Psychiatric Research, Broad Institute of MIT and Harvard, Cambridge,  
73 MA, 02142, USA  
74 39: USRA/NASA Ames Research Center, Moffett Field, CA, 94035, USA

75

76

77

78 †Co-first authors

79 \*Corresponding authors

80 \*Correspondence: [sylvain.v.costes@nasa.gov](mailto:sylvain.v.costes@nasa.gov), [jonathan.m.galazka@nasa.gov](mailto:jonathan.m.galazka@nasa.gov)

81

## 82 **Summary**

83 With the development of transcriptomic technologies, we are able to quantify precise changes in  
84 gene expression profiles from astronauts and other organisms exposed to spaceflight. Members of  
85 NASA GeneLab and GeneLab-associated analysis working groups (AWGs) have developed a

86 consensus pipeline for analyzing short-read RNA-sequencing data from spaceflight-associated  
87 experiments. The pipeline includes quality control, read trimming, mapping, and gene  
88 quantification steps, culminating in the detection of differentially expressed genes. This data  
89 analysis pipeline and the results of its execution using data submitted to GeneLab are now all  
90 publicly available through the GeneLab database. We present here the full details and rationale for  
91 the construction of this pipeline in order to promote transparency, reproducibility and reusability  
92 of pipeline data, to provide a template for data processing of future spaceflight-relevant datasets,  
93 and to encourage cross-analysis of data from other databases with the data available in GeneLab.

## 94 **Introduction**

95 Opportunities to perform biological studies in space are rare due to high costs and a limited  
96 number of funding sources, rocket launches, and spaceflight crew hours for experimental  
97 procedures. Additionally, spaceflight research is decentralized and distributed across numerous  
98 laboratories in the United States and abroad. As a result, studies performed in different laboratories  
99 often utilize different organisms, strains, cell lines, and experimental procedures. Adding to this  
100 complexity are variance in spaceflight factors and/or confounders within each study, such as  
101 degree of radiation exposure, experiment duration, CO<sub>2</sub> concentration, light cycle, and water  
102 availability, all of which can have effects on an organism's health and gene expression profiles  
103 during spaceflight (Rutter et al. n.d.). In order to optimize the integration of data from this diverse  
104 array of spaceflight experiments, it is paramount that variations in data processing are minimized.

105 There is presently no consensus on how best to analyze RNA-seq data and the impact of  
106 analysis tool selection on results is an active field of research. Indeed, selections of trimming  
107 parameters (Williams et al. 2016), read aligner (Yang et al. 2015), quantification tool (Teng et al.  
108 2016), and differential expression detection algorithm (Costa-Silva, Domingues, and Lopes 2017)  
109 all affect results. Because of such challenges, groups like ENCODE and MINSEQE have  
110 developed standardized analysis pipelines for better comparison of RNA-seq datasets (ENCODE  
111 Project Consortium et al. 2020; "FGED: MINSEQE" n.d.).

112 The NASA GeneLab database (<https://genelab-data.ndc.nasa.gov/genelab/projects>) was  
113 created as a central repository for spaceflight-related omics-data. The repository includes data from  
114 experiments that profile transcription (RNA-seq, microarray), DNA/RNA methylation, protein

115 expression, metabolite pools, and metagenomes. The most prevalent data type in this repository is  
116 RNA-seq from organisms exposed to spaceflight conditions. As of August 2020, the NASA  
117 GeneLab database has over eighty datasets with RNA-sequencing data [Table S1]. These datasets  
118 include *Homo sapiens* (human), *Mus musculus* (mouse), *Drosophila melanogaster* (fruit fly),  
119 *Arabidopsis thaliana* (model higher plant), *Oryzias latipes* (Japanese rice fish), *Helix lucorum*  
120 (land snail), *Brassica rapa* (Fast Plant®), *Eruca vesicaria* (arugula/edible plant), *Euprymna*  
121 *scolopes* (Hawaiian bobtail squid), *Ceratopteris richardii* (aquatic fern), and the bacterium,  
122 *Bacillus subtilis* from experiments performed during true spaceflight on various orbital platforms  
123 such as the Space Shuttle and International Space Station (ISS), as well as spaceflight-analog  
124 studies, such as hindlimb unloading and bed rest studies (Berrios et al., n.d.).

125 NASA's GeneLab and Ames Life Sciences Data Archive (ALSDA) projects have put  
126 forward an ambitious strategy focused on integrating data, metadata, and biospecimens to fully  
127 utilize the 40+ years of archived NASA Life Sciences data (Scott et al. 2020). One of the first steps  
128 in this effort is the ability to analyze how experimental factors common to multiple datasets impact  
129 molecular signaling. Such meta-analysis can only occur if metadata, data, and processed data are  
130 harmonized. As part of this strategy, GeneLab engaged with the scientific community and held its  
131 first Analysis Working Group (AWG) workshop in 2018. Spaceflight researchers from universities  
132 and organizations across the United States and abroad met to begin the creation of a standardized,  
133 consensus data-processing pipeline for one of the most common types of spaceflight datasets:  
134 transcription profiling via RNA-sequencing. Scientists at this workshop met to discuss the merits  
135 of various bioinformatic software tools for processing RNA-sequencing data, and ultimately  
136 agreed on a single pipeline of these tools.

137 The main driver for developing the consensus pipeline was to present consistently  
138 processed data to the public, therefore making space-relevant multi-omics data more accessible  
139 and reusable. The overall goals were: 1) To get more consistently processed data to the public; 2)  
140 To provide output data from every step of the consensus pipeline so users can download and use  
141 these "intermediate" data; 3) To support easier and more consistent analysis of space-relevant data  
142 by users including those in the NASA AWGs; and 4) To allow easier cross-analysis of experiments  
143 to identify effects that result from the spaceflight environment, independent of confounding  
144 factors. In addition, many of these data in the GeneLab database have not been previously  
145 analyzed, as their generation was relatively recent. Therefore, providing new and processed

146 datasets to the public allows biologists and others to more easily interpret these data, and  
147 contributes significantly to our collective knowledge of the effects of spaceflight on terrestrial  
148 organisms.

149 Here we present the RNA-seq consensus pipeline (RCP) developed by the GeneLab AWG  
150 along with the rationale behind the tool settings and options selected. The RCP includes three  
151 distinct steps: data pre-processing, data processing, and differential gene expression  
152 computation/annotation [Fig 1A]. These steps use tools for quality control (FastQC, MultiQC)  
153 (Andrews and Others 2010; Ewels et al. 2016), read trimming (TrimGalore) (Krueger 2019),  
154 mapping (STAR) (Dobin et al. 2013), quantification (RSEM) (B. Li and Dewey 2011), and  
155 differential gene expression calculation/annotation (DESeq2) (Love, Huber, and Anders 2014)  
156 [Fig 1B]. The RCP has been integrated into the GeneLab database and files produced by the RCP  
157 for each RNA-seq dataset hosted in GeneLab are and will continue to be publicly available for  
158 download.

## 159 **Results**

### 160 **Data Pre-processing: Quality Control and Trimming**

161 There are three distinct steps to the RCP, the first of which is data preprocessing [Fig 2A].  
162 The pipeline begins with quality control (QC) of raw FASTQ files from a short-read Illumina  
163 sequencer using the FastQC software (Andrews and Others 2010) [Fig 2B]. FastQC is one of the  
164 most widely used QC programs for short-read sequencing data. It provides information which can  
165 be used to assess sample and sequencing quality, including base statistics, per base sequencing  
166 quality, per sequence quality scores, per base sequence content, per base GC content, per sequence  
167 GC content, per base N content, sequence length distributions, sequence duplication levels,  
168 overrepresented sequences and k-mer content.

169 The FastQC program is run on each individual sample file. However, reviewing the FastQC  
170 results for each sample file can be tedious and time consuming. Experiments typically have many  
171 sample files (biological and/or technical replicates) for multiple experimental conditions  
172 (spaceflight, ground control, etc). For this reason, we also use the MultiQC package (Ewels et al.  
173 2016) [Fig 2C] to create a summary statistics report that includes the same quality control result  
174 categories from FastQC across all experiment samples.

175           After performing quality control on the raw FASTQ data, reads are trimmed using  
176 TrimGalore (Krueger 2019) to remove sequencing adapters that would disrupt read mapping  
177 during the data processing pipeline step [Fig 2D]. Quality trimming is not performed as this has  
178 been shown to decrease the accuracy of quantification results (Williams et al. 2016). TrimGalore  
179 is a wrapper program that uses the cutadapt program (Martin 2011) for read trimming. TrimGalore  
180 was selected for the RCP due to its simplified command line interface, thorough output of trimming  
181 metrics, and ability to automatically detect adapters. In this step, bases that are part of a sequencing  
182 adapter are removed from each read and reads that become too short will subsequently be removed.  
183 After trimming, the quality control programs, FastQC and MultiQC, are again run on the trimmed  
184 FASTQ files for viewing the quality control metrics of the reads that will be used for data  
185 processing. Once the data has been preprocessed, the sequenced reads are ready for mapping and  
186 quantification.

187

#### 188 **Data Processing: Read Mapping and Sample Quantification**

189

190           In the data processing step [Fig 1; Step 2A], the trimmed reads are first aligned to the  
191 reference genome [Fig 3A] with STAR, a splice-aware aligner (Dobin et al. 2013). STAR must be  
192 run in two steps. The first step is to create indexed genome files [Fig 3B]. These files are used to  
193 assist read mapping and only need to be generated once for each reference genome file. This step  
194 requires reference FASTA and GTF files [Table S2]. Some datasets include the External RNA  
195 Control Consortium (ERCC) spike-in control - a pool of 96 synthetic RNAs with various lengths  
196 and GC content covering a  $2^{20}$  concentration range (Jiang et al. 2011). If ERCC spike-ins were  
197 included, the spike-in FASTA and GTF files are appended to the reference FASTA and GTF files,  
198 respectively. The second step of STAR mapping is to use the indexed reference genome and the  
199 trimmed reads from the preprocessing step in order to map the reads to the genome and the  
200 transcriptome [Fig 3C]. STAR will also produce genome mapped data, which can optionally be  
201 used to find reads that map outside of annotated reference transcripts. STAR mapping output data  
202 are in BAM format, which has a separate entry for each mapped read and states which transcript  
203 each read mapped to. In order to improve the detection and quantification of splice sites, STAR is  
204 run in “two-pass mode”. Here, splice sites are detected in the initial mapping to the reference and  
205 used to build a new reference that includes these splice sites. Reads are then re-mapped to this

206 dynamically generated reference to improve the quantification of splice isoforms (Dobin et al.  
207 2013). Users are provided with these results (as per sample SJ.out files) for further analysis of  
208 differential splicing.

209         The second part of processing is quantifying the number of reads mapped to each annotated  
210 transcript and gene [Fig 1A; Step 2B]. For this task, the RCP uses RSEM (B. Li and Dewey 2011)  
211 [Fig. 4A]. The main reasons for using RSEM are its ability to account for reads that map to multiple  
212 transcripts and distinguish gene isoforms. In short-read sequencing experiments it is likely that  
213 some number of reads will map to multiple regions in the genome. RSEM computes maximum  
214 likelihood abundance estimates to split the read count across multiple genes. Similar to STAR,  
215 RSEM is run in two distinct phases. The first phase uses the reference genome and GTF files (with  
216 or without ERCC as appropriate) [Table S2] to prepare indexed genome files [Fig 4B]. The second  
217 phase uses the indexed files and the mapped reads from STAR to assign counts to each gene [Fig  
218 4C]. There are two output files generated for each sample: counts assigned to genes and counts  
219 assigned to isoforms. Gene counts are used to calculate differential gene expression. Isoform  
220 counts are also generated as an option to look at differential isoform expression but are not used  
221 during differential gene expression calculation in the RCP. Once the RSEM count files are  
222 generated, the data are used to compute differentially expressed genes. A list of the reference  
223 genomes used in the GeneLab pipeline is available in Supplementary Table 2 [Table S2]. These  
224 reference genomes were the most recent releases at the time each STAR and RSEM indexed  
225 references were created. While it is possible to run STAR mapping through the RSEM toolkit, we  
226 elected not to do this because the alignment parameters used in this case are from ENCODE's  
227 STAR-RSEM pipeline and are not customizable. Thus, we would have been precluded from using  
228 the precise mapping parameters agreed to by the GeneLab AWG.

229         We elected to adopt a mapping-based approach rather than rapidly quantifying the reads  
230 via a k-mer-based counting algorithm, pseudo-aligners, or a quasi-mapping method that utilizes  
231 RNA-seq inference procedures such as Kallisto (Bray et al. 2016) or Salmon (Patro et al. 2017)  
232 despite their speed advantages. This is because alignment-free quantification tools do not  
233 accurately quantify low-abundant and small RNAs especially when biological variation is present  
234 (Wu et al. 2018). Furthermore, alignment of reads allows for additional analyses beyond transcript  
235 and gene quantification such as measurement of gene body coverage and detection of novel  
236 transcripts.



237           There are several alignment-based mapping tools available and each has advantages and  
238 disadvantages. An alignment tool that is sensitive to splice-isoforms is critical to accurately  
239 identify how expression of splice-isoforms is affected by the spaceflight environment. DNA-  
240 specific aligners such as BWA (H. Li and Durbin 2009) and Bowtie (Langmead et al. 2009) cannot  
241 handle intron-sized gaps and thus an RNA-seq specific aligner is needed (Baruzzo et al. 2017). In  
242 addition to splice-awareness, when selecting an aligner the following criteria were also considered:  
243 ability to input both single- and paired-end reads, handle strand-specific data, applicability to a  
244 variety of different model organisms with both low- and high-complexity genomic regions,  
245 efficient runtime and memory usage, ability to identify chimeric reads, high sensitivity, low rate  
246 of false discovery, and ability to output both genome and transcriptome alignments. Several studies  
247 have been conducted to compare the wide variety of available RNA-seq specific alignment tools,  
248 and of these, the STAR aligner consistently performs better than, or on par with the tools tested  
249 for the indicated criteria (Baruzzo et al. 2017; Schaarschmidt et al. 2020; Raplee, Evsikov, and  
250 Marín de Evsikova 2019).

251

## 252 **Differential Gene Expression Calculations and Addition of Gene Annotations**

253           Once reads have been mapped and quantified, differential expression analysis is performed  
254 using the DESeq2 R package [Fig 1; Step 3, Fig 5A]. Unlike the previous steps, a custom R script  
255 GeneLab\_DGE\_noERCC.R or (GeneLab\_DGE\_wERCC.R) [Scripts S1, S2] is used to run  
256 DESeq2, to create both unnormalized and normalized counts tables, and to generate a differential  
257 gene expression (DGE) output table containing normalized counts for each sample, DGE results,  
258 and gene annotations [Fig 5B]. The GeneLab DGE R script also creates computer-readable tables  
259 that are used by the GeneLab visualization portal to generate various plots so users can easily view  
260 and begin interpreting the processed data. These scripts are provided in the NASA  
261 GeneLab\_Data\_Processing                           Github                           repository  
262 ([https://github.com/nasa/GeneLab\\_Data\\_Processing](https://github.com/nasa/GeneLab_Data_Processing)). In the following sections we describe each  
263 step of these sections in order.

264           The GeneLab DGE R script requires three inputs: the quantified counts data from the  
265 previous (RSEM) step, sample metadata from the Investigation, Study, and Assay (ISA) tables in  
266 the ISA.zip file (provided in the GeneLab repository with each dataset) (Sansone et al. 2012;  
267 Rocca-Serra et al. 2010), and the organisms.csv file [Table S3], which is used to specify the

268 organism used in the study and relevant gene annotations to load. Since samples from some  
269 GeneLab RNA-seq datasets contain ERCC spike-in and others do not, there are two versions of  
270 the GeneLab DGE R script, one for datasets with ERCC spike-in (GeneLab\_DGE\_wERCC.R,  
271 Script S1) and one for those without (GeneLab\_DGE\_noERCC.R, Script S2). Prior to running  
272 either script, paths to directories containing the input data and the output data location must be  
273 defined. Each script starts by defining the organism used in the study, which should be consistent  
274 with the name in the organisms.csv file so that it matches the abbreviations used in the PANTHER  
275 database (Mi, Muruganujan, and Thomas 2013; Thomas 2003) for each organism. Next, the  
276 metadata from the ISA.zip file are imported and formatted for use with the DESeq2 package.  
277 During metadata formatting, groups for comparison are defined based on experimental factors and  
278 a sample table is created to specify the group to which each sample belongs. Next, a contrasts  
279 matrix is generated, which specifies the groups that will be compared during DGE analysis; each  
280 group is compared with every other group in a pairwise manner in both directions (i.e. spaceflight  
281 vs. ground and ground vs. spaceflight). This approach provides the user with the results for all  
282 possible group comparisons, allowing each user to select the most relevant comparisons for their  
283 particular scientific questions. After metadata formatting, the RSEM gene count data files from  
284 each sample are listed and re-ordered (to match the order the samples appear in the metadata), then  
285 imported with the R package, tximport (Soneson, Love, and Robinson, n.d.), and sample names  
286 are assigned. Prior to running DESeq2, a value of 1 is added to genes with lengths of zero, which  
287 is necessary to make a DESeqDataSet object. A DESeqDataSet object is then created using the  
288 formatted metadata and the count data that was imported with tximport.

289 For datasets that contain samples without ERCC spike-in, we use the  
290 GeneLab\_DGE\_noERCC.R script [Script S1]. To reduce the possibility of skewing the data during  
291 DESeq2 normalization (McIntyre et al. 2011; Risso et al. 2011; Conesa et al. 2016; Law et al.  
292 2016), all genes that have a sum of less than 10 counts across all samples are removed. The cutoff  
293 value of 10 is a best practice recommended by the DESeq2 tutorial on Bioconductor. These filtered  
294 data are then prepared for normalization and DGE analysis with DESeq2. Since there is no  
295 consensus for whether or not ERCC-normalization improves the accuracy of the results (Risso et  
296 al. 2014), the GeneLab project and its AWG members decided to perform the DGE analysis both  
297 with and without ERCC-normalization (for datasets with samples containing ERCC spike-in).

298 To enable DESeq2 analysis with and without considering ERCC reads, the DESeqDataSet  
299 object is used to create a DESeqDataSet object containing only ERCC reads. Since all samples  
300 must contain ERCC spike-in for ERCC-normalization, the DESeqDataSet object containing only  
301 ERCC reads is used to identify and remove any samples that do not contain ERCC reads. Next, a  
302 DESeqDataSet object containing only non-ERCC reads is created by removing rows containing  
303 ERCC reads. These data are then used for DESeq2 analysis.

304 For DESeq2 analysis with ERCC-normalization (Script S2), the size factor object of the  
305 non-ERCC data is replaced with ERCC size factors for re-scaling in the first DESeq2 step. For  
306 DESeq2 analysis without ERCC-normalization, the DESeq2 default algorithm is applied to the  
307 DESeqDataSet object containing only non-ERCC reads. The unnormalized and DESeq2-  
308 normalized counts data as well as the sample table are then outputted as CSV files. The  
309 ‘Unnormalized\_Counts.csv’, ‘Normalized\_Counts.csv’, and ‘ERCC\_Normalized\_Counts.csv’  
310 files for each RNA-seq dataset are available in the GeneLab Data Repository; the  
311 ‘SampleTable.csv’ file is used internally for verifying and validating the processed data prior to  
312 publication.

313 There are two types of hypothesis tests that can be run with DESeq2, the likelihood ratio  
314 test (LRT), which is similar to an analysis of variance (ANOVA) calculation in linear regression  
315 and allows for comparison across all groups, and the Wald test, in which the estimated standard  
316 error of a log<sub>2</sub> fold change is used to compare differences between two groups. The DGE step of  
317 the RCP performs both of these analyses. After normalization, the DESeq2 likelihood ratio test  
318 design is applied to the normalized data (both ERCC- and nonERCC-normalized data) to generate  
319 the F statistic p-value, which is similar to an ANOVA p-value and reveals genes that are changed  
320 in any number of combinations of all factors defined in the experiment.

321 To prepare for building a gene/pathway annotation database, the STRINGdb (Szklarczyk  
322 et al. 2019) and PANTHER.db (Thomas 2003) libraries are loaded and the organisms.csv file is  
323 read and used to indicate the Bioconductor AnnotationData Package needed (Huber et al. 2015;  
324 Gentleman et al. 2004). The current gene annotation database for the organism specified at the  
325 beginning of the R script is then loaded.

326 Next, DGE tables containing normalized counts for each sample, pairwise DGE results,  
327 and current gene annotations as well as computer-readable DGE tables (that will be used for  
328 visualization) are created first with nonERCC-normalized data and then with ERCC-normalized

329 data. For pairwise DGE analysis, first normalized count data are used to create two output tables,  
330 one that is used to create the human-readable DGE output table provided to users with processed  
331 data for each dataset, and the respective computer-readable DGE output table that contains  
332 additional columns and is used to visualize the data. Next, normalized count data are iterated  
333 through Wald Tests to generate pairwise comparisons of all groups based on the contrasts matrix  
334 that was generated during metadata formatting. The pairwise DGE analysis results are then added  
335 as columns to both DGE output tables.

336 Then an annotation database is built by first defining the “keytype”, which indicates the  
337 primary type of annotation used (for most GeneLab datasets this is ENSEMBL). The keytype is  
338 then used to map to annotations in the organism-specific Bioconductor AnnotationData Package,  
339 and the following annotation columns are added to the annotation database: SYMBOL,  
340 GENENAME, ENSEMBL (if not the primary), REFSEQ, and ENTREZID. STRING and  
341 GOSLIM annotation columns are also added to the annotation database using the STRINGdb and  
342 PANTHER.db R packages, respectively. All of the aforementioned annotation columns are added  
343 to the annotation database to enable users to perform downstream analyses without having to map  
344 gene IDs themselves. Once the annotation database is complete, additional calculations are  
345 performed on the normalized count data before assembling the final DGE output tables.

346 Means and standard deviations of normalized count data for each gene across all samples,  
347 and for samples within each respective group, are calculated and added as columns to the DGE  
348 output tables. A column containing the F statistic p-value, calculated previously, is also added to  
349 the DGE output tables. The following columns are added only to the computer-readable DGE  
350 output table (used for visualization): a column to indicate whether each gene (or pathway) is up-  
351 or down-regulated for each pairwise comparison, a column to indicate genes that are differentially  
352 expressed using a p-value cutoff of  $\leq 0.1$  and another column using a p-value cutoff of  $\leq 0.05$ , a  
353 column indicating the  $\log_2$  of the p-value for each pairwise comparison and another column  
354 indicating the  $\log_2$  of the adjusted p-value, both of which are used to create Volcano plots. After  
355 all columns are added to the DGE tables, both the human- and computer-readable DGE tables are  
356 combined with the current annotation database to create the complete human- and computer-  
357 readable DGE tables. An example of the complete human readable DGE tables provided with  
358 processed RNAseq datasets in the GeneLab Data Repository is shown in Table 1 and Table 2.  
359 Principal component analysis (PCA) is also performed on the normalized count data and used to

360 create PCA plots for the GeneLab data visualization portal. DGE analysis of datasets without  
361 ERCC spike-in is performed exactly the same way as the nonERCC-normalized approach  
362 described above, except that no ERCC reads have to be removed from the DESeqDataSet object  
363 prior to DESeq analysis.

364 Both the GeneLab\_DGE\_wERCC.R and the GeneLab\_DGE\_noERCC.R scripts produce  
365 the following output files: Unnormalized\_Counts.csv (\*), Normalized\_Counts.csv (\*),  
366 SampleTable.csv (#), contrasts.csv (\*), differential\_expression.csv (\*),  
367 visualization\_output\_table.csv (\*\*), visualization\_PCA\_table.csv (\*\*) [Fig 5B, Table 1, Table 2].  
368 The GeneLab\_DGE\_wERCC.R script will also produce the following additional output files:  
369 ERCC\_rawCounts\_unfiltered.csv (#), ERCC\_rawCounts\_filtered.csv (#),  
370 ERCCnorm\_contrasts.csv (\*), ERCC\_Normalized\_Counts.csv (\*),  
371 ERCCnorm\_differential\_expression.csv (\*), visualization\_output\_table\_ERCCnorm.csv (\*\*),  
372 visualization\_PCA\_table\_ERCCnorm.csv (\*\*) [Fig 5B, Table 1, Table 2]. All the tools used in the  
373 consensus pipeline described above are documented in Supplemental Table 4: Pipeline Tools and  
374 Links [Table S4].

375

#### 376 **A Use Case for Data Processed with the RCP**

377 To showcase the value of using a consensus pipeline and publishing the processed data  
378 from each step of the pipeline, downstream analyses were performed using processed data from  
379 select samples from RNAseq datasets hosted on GeneLab. One of the advantages of providing  
380 expression data of all samples in each dataset as well as all possible pairwise DGE comparisons is  
381 to allow users the flexibility to pick and choose which samples and which comparisons they would  
382 like to focus on. Thus, when selecting samples for downstream analysis, we exercised this  
383 flexibility and searched the GeneLab Data Repository for datasets/samples that met a specific set  
384 of criteria. These criteria were as follows: 1) datasets that evaluated the same tissue (liver) from  
385 the same mouse strain (C57BL/6) and sex (female), 2) only samples derived from animals flown  
386 in space and respective ground control samples, 3) studies that used the same preservation protocol  
387 (liver samples extracted from frozen carcasses post-mission) and library preparation method (ribo-  
388 depletion), and 4) samples that contained ERCC spike-in to evaluate outputs with and without  
389 ERCC normalization. Select samples from two GeneLab datasets, GLDS-168 and GLDS-245 met  
390 these criteria and processed data including the Normalized\_Counts.csv,

391 differential\_expression.csv, ERCC\_Normalized\_Counts.csv, and the  
392 ERCCnorm\_differential\_expression.csv files from these two datasets were used for downstream  
393 analyses.

394 Prior to downstream analysis, the processed data files were filtered so that only samples  
395 that met the criteria listed above were included. Since GLDS-168 contains samples from both the  
396 Rodent Research 1 (RR-1) and RR-3 missions and only the RR-1 mission met our first criteria of  
397 using the C57BL/6 mouse strain, RR-3 samples were removed from the process data files. GLDS-  
398 168 processed data files were subsequently filtered to remove all samples except spaceflight (FLT)  
399 and respective ground control (GC) samples to meet the second criteria listed above. Lastly, since  
400 GLDS-168 contains a set of FLT and GC samples that were spiked with ERCC and another set in  
401 which ERCC was not added, the later set of samples were removed to meet the fourth criteria.  
402 GLDS-245 contains liver samples from the RR-6 mission, which included a set of animals that  
403 were returned to earth alive after ~30 days of spaceflight and another set of animals that remained  
404 in space (aboard the ISS) for a total of ~60 days before being sacrificed aboard the ISS (note that  
405 there were respective control samples for each set of spaceflight animals described). The former  
406 set of animals had their livers dissected immediately after euthansia whereas livers from the latter  
407 set of animals were frozen in situ and dissected from frozen carcasses after return to earth. Thus,  
408 only the later (ISS-terminal) set of FLT and respective GC samples met criteria 2 and 3, so the  
409 GLDS-245 processed data files were filtered to remove all other samples. A complete list of all  
410 samples from GLDS-168 and GLDS-245 that were included in this analysis are provided in  
411 Supplemental Table S5 [Table S5]. Additionally, since the downstream analyses focused on the  
412 differences between FLT and GC samples in these two datasets, all other comparisons were  
413 removed from the differential\_expression.csv and ERCCnorm\_differential\_expression.csv files  
414 prior to analysis.

415 The filtered processed data files (available in Mendeley Data,  
416 <http://dx.doi.org/10.17632/fv3kd6h7k4.1>) were then used to create Principal Component Analysis  
417 (PCA) plots [Fig 6A, 6B and Fig S1A, S1B], heatmaps containing the top 30 most significant FLT  
418 vs. GC differentially expressed (and annotated) genes ( $\text{adj. } p \text{ value} < 0.05$  and  $|\log_2\text{FC}| > 1$ ) [Fig  
419 6C, 6D and Fig S1C, S1D], and to evaluate FLT vs. GC gene ontology (GO) differences using  
420 Gene Set Enrichment (GSEA) analysis [Table 3, Table S6]. These results can then be further  
421 evaluated to identify similarities and differences in gene expression between these two studies and

422 draw novel conclusions about the effects of spaceflight that are consistent across spaceflight  
423 experiments.

## 424 **Discussion**

425 The differentially expressed genes calculated by the RCP can be further explored with a  
426 variety of tools designed for higher-order analysis. For example, there are tools which can look for  
427 enriched pathways, gene ontology terms, or protein and/or metabolite networks. Popular software  
428 tools among the GeneLab working group members include WebGestalt (Liao et al. 2019),  
429 STRING (Szklarczyk et al. 2019), GSEA (Subramanian et al. 2005), PIANO (Väremo, Nielsen,  
430 and Nookaew 2013), Reactome (Szklarczyk et al. 2019), and ToppFun (Chen et al. 2009). There  
431 is no universal consensus on which tools are the most useful for higher-order analysis (Nguyen et  
432 al. 2019). RCP users are encouraged to try multiple tools in order to analyze their data from a  
433 variety of perspectives.

434 The RCP has been designed to handle sequencing experiments that either lack or include  
435 the ERCC RNA spike-in mix - a set of 96 polyadenylated RNAs that can be used during differential  
436 gene expression calculation to normalize read counts across samples (Munro et al. 2014).  
437 However, the use of normalization according to ERCC spike-ins remains controversial among  
438 AWG members, and Munro *et al.* suggested its usage only for determining limit of detection of  
439 ratio (LODR), expression ratio variability and measurement bias (Munro et al. 2014). For this  
440 reason, ERCC normalization remains optional in the GeneLab pipeline and both kinds of DGE  
441 outputs are provided in the GeneLab database. Additionally, ERCC spike-in could have two other  
442 usages. First, it allows us to evaluate whether normalization succeeded in removing systemic bias  
443 between libraries by using methods such as Rlog and VST when normalizing the spike-in RNAs  
444 along with all other genes. Second, most normalization methods of RNA-seq data assume that  
445 most genes are not differentially expressed towards one direction. Comparing spike-in  
446 measurements between libraries will help us to estimate the validity of this assumption.

447 A high number of biological replicates can increase certainty in the differentially  
448 expressed genes determined by the RCP. However, conducting experiments in spaceflight often  
449 limits the number of biological replicates that a researcher can include. Therefore, it is important  
450 to note that at least three biological replicates are required for the pipeline, specifically for DESeq2,

451 to perform its statistical methods. However, at least six replicates are suggested in order to  
452 minimize the false discovery rate (FDR) (Schurch et al. 2016). Finally, RNA-seq datasets hosted  
453 on GeneLab that do not contain biological replicates are only processed up until unnormalized  
454 (raw) counts are obtained, the step right before DESeq2 is used for DGE calculation.

455 More advanced RCP users might have additional data inquiries that fall beyond the scope  
456 of this pipeline. For this reason, there are two parts of the pipeline that include additional output  
457 that are not used in our differential gene expression computation. The first is in the output from  
458 STAR, mapping output is also provided in genomic coordinates. This is useful for obtaining reads  
459 that are mapped outside of the reference transcriptome. For example, this may be used to find  
460 novel genes, transcripts, or exons that have not yet been annotated by consortiums. The second  
461 part of the pipeline with alternative output files is RSEM. This also provides transcript-level counts  
462 which can be used to investigate differential isoform expression. Moreover, intermediate files are  
463 provided as outputs to allow users to use components of the pipeline that they find useful.

464 The GeneLab database also includes other types of transcriptomic data. As discussed in  
465 this article, the RCP is not used for microarray data which are fundamentally different, and the  
466 AWG is still debating the best approach for cross-dataset comparisons between microarrays.  
467 GeneLab also accepts data from long read experiments, such as those produced by Pacific  
468 Biosciences' (PacBio) single-molecule real-time (SMRT) sequencing (Roberts, Carneiro, and  
469 Schatz 2013) and Oxford Nanopore Technologies' (ONT) nanopore sequencing (Jain et al. 2016).  
470 Long-read data would be processed with similar steps to the RCP but will require tools specifically  
471 designed for the intricacies of long-read data, such as reads that contain multiple splice junctions  
472 and reads which currently have a higher base-calling error-rate. Currently, long-reads are typically  
473 used for DNA sequencing and were recently highlighted on board of the ISS using ONT for de  
474 novo assembly of the *E. coli* genome from raw reads (Castro-Wallace et al. 2017). However, even  
475 though throughput and accuracy remain far inferior to short-reads, long-reads offer some  
476 advantages for RNAseq as well, with less ambiguity for genes and isoforms detection, much faster  
477 mapping, potential identification of genes not yet known from reference genomes and eventually  
478 less bias in DGE.

479 To conclude, the RCP is specifically designed for RNA-seq data from short-read  
480 sequencers and has been developed in order to encourage and facilitate analysis of spaceflight  
481 multi-omic data. The creation of the RCP by a large community of scientists (GeneLab AWG:



482 <https://genelab.nasa.gov/awg>) and the sharing of pipeline details in a peer-reviewed article provide  
483 analysis transparency and enable data reproducibility.

484

#### 485 **Limitations of the Study**

486 The results of this study are limited to short-read RNA-seq and are not applicable to other  
487 transcriptomic profiling methods (e.g. microarray, long-read RNA-seq). Additionally, the pipeline  
488 cannot compensate for poor library preparation technique or inadequate sample size. Sample  
489 preservation protocols between datasets need to also be evaluated, since variations in sample  
490 preservation protocol could lead to poor correlation between studies that are otherwise identical  
491 (Polo et al. 2020). The number of sequenced reads may also be a limiting factor in the usefulness  
492 and accuracy of the differentially expressed genes calculated by DESeq2 and, similarly, during  
493 splice isoform analysis.

494 Note that this article does not discuss strategies and pipelines regarding older  
495 transcriptomics data in GeneLab (i.e. more than 100 microarray datasets), as it is much more  
496 challenging to provide meta-analysis with microarrays, which are prone to strong batch effects and  
497 gene lists which are platform dependent. Future efforts of GeneLab and the AWG will address  
498 microarray pipelines.

499 In the future, we will add functionality to process unique molecular identifiers (UMIs) that  
500 can identify PCR duplicates using tools such as UMI-tools (Smith, Heger, and Sudbery 2017).  
501 This will allow PCR duplicates to be removed after mapping and before quantification.

502 Additionally, transcriptomic data will be integrated with proteomic and metabolomics data;  
503 this will help further understand the significance of gene expression changes to metabolic “fitness”  
504 in the spaceflight environment.

505

506

#### 507 **Resource Availability**

508 Lead Contact: Jonathan M. Galazka

509 Materials Availability: No unique reagents were generated in this study.

510 Data and Code Availability: Spaceflight-relevant RNA-seq data is located in the GeneLab database  
511 (<https://genelab-data.ndc.nasa.gov/genelab/projects>). All software packages are open source and  
512 are linked in the methods section. Custom R scripts for DESeq2 are included as supplemental  
513 information and are available in the Github repository [GeneLab\\_Data\\_Processing](https://github.com/nasa/GeneLab_Data_Processing)  
514 ([https://github.com/nasa/GeneLab\\_Data\\_Processing](https://github.com/nasa/GeneLab_Data_Processing)). Raw data utilized to generate plots are  
515 available on Mendeley Data (<http://dx.doi.org/10.17632/fv3kd6h7k4.1>).

## 516 **Methods**

517 The tools used in the consensus pipeline are documented in Supplemental Table 4:  
518 Pipeline Tools and Links [Table S4]. Due to NASA security requirements, all software is  
519 updated monthly with security patching. Therefore, tool versions used to process each RNA-seq  
520 dataset hosted on the GeneLab Data Repository are provided in the RNA-seq protocol section  
521 and are also available along with exact processing scripts in the GeneLab Data Processing  
522 GitHub Repository  
523 ([https://github.com/nasa/GeneLab\\_Data\\_Processing/tree/master/RNAseq/GLDS\\_Processing\\_Scripts](https://github.com/nasa/GeneLab_Data_Processing/tree/master/RNAseq/GLDS_Processing_Scripts)).  
524 Specific commands, options, and flags for each tool used in the RCP are reported in the  
525 figures of the main text. Note that some packages listed here are dependencies of the packages  
526 used in the RCP. More information about such dependencies can be found in the tool  
527 documentation.

528 This pipeline has been run on short-read RNA-seq data in the GeneLab database  
529 (<https://genelab-data.ndc.nasa.gov/genelab/projects>) and is applied to new submissions to the  
530 database. Any updates to the software used in the pipeline will be noted in the Github repository  
531 [GeneLab\\_Data\\_Processing](https://github.com/nasa/GeneLab_Data_Processing) ([https://github.com/nasa/GeneLab\\_Data\\_Processing](https://github.com/nasa/GeneLab_Data_Processing)).

532 Processed RNAseq data from GLDS-168 and GLDS-245 select samples were used to  
533 provide an example of the downstream analyses that can be done using data processed with the  
534 consensus pipeline presented here. Normalized counts and ERCC-normalized counts from the  
535 following GLDS-168 and GLDS-245 samples were used to generate the PCA plots shown in  
536 Figure 6A & 6B and Supplemental Figure 1A & 1B, respectively. Samples from GLDS-168 and  
537 GLDS-245 that were used in this study are listed in Supplemental Table 5 [Table S5]. Differential  
538 gene expression (DGE) data from FLT versus GC samples using (non-ERCC) normalized counts

539 and ERCC-normalized counts data for each respective dataset were used to generate the heatmaps  
540 shown in Figure 6C & 6D and Supplemental Figure 1C & 1D, respectively. DGE data were filtered  
541 using an adjusted p value cutoff of  $< 0.05$  and  $|\log_2FC|$  cutoff of  $> 1$ . The gene expression data  
542 were then sorted based on adjusted p values and the top 30 most differentially expressed and  
543 annotated genes were used to generate heatmaps with ggplot2 version 3.3.2 (Wickham, Navarro,  
544 and Pedersen 2016). Note that for visualization purposes, sample names were shortened.

545 Pairwise gene set enrichment analysis (GSEA) was performed on the (non-ERCC)  
546 normalized counts (Table 3) and ERCC-normalized counts [Table S6] from select samples in  
547 GLDS-168 and GLDS-245 using the C5: Gene Ontology (GO) gene set (MSigDB v7.2) as  
548 described (Subramanian et al. 2005). All comparisons were performed using the phenotype  
549 permutation. The ranked lists of genes were defined by the signal-to-noise metric and the statistical  
550 significance were determined by 1000 permutations of the gene set.  $FDR \leq 0.25$  were considered  
551 significant for comparisons according to the authors' recommendation.

552 The data used to generate all PCA plots, heatmaps, and GSEA shown are provided on  
553 Mendeley (<http://dx.doi.org/10.17632/fv3kd6h7k4.1>).

#### 554 **Acknowledgments**

555 This work was funded in part by the NASA Space Biology program within the NASA Science  
556 Mission Directorate's (SMD) Biological and Physical Sciences (BPS) Division, NASA award  
557 numbers NNX15AG56G, 80NSSC19K0132, the Biotechnology and Biological Sciences  
558 Research Council (grant number BB/ N015894/1), the MRC Versus Arthritis Centre for  
559 Musculoskeletal Ageing Research (grant numbers MR/P021220/1 and MR/R502364/1), the  
560 Spanish Research Agency (AEI grant number RTI2018-099309-B-I00, co-funded by EU-ERDF)  
561 and the National Institute for Health Research Nottingham Biomedical Research Centre. The  
562 views expressed are those of the author(s) and not necessarily those of the NHS, the NIHR or the  
563 Department of Health and Social Care.

#### 564 **Author Contributions**

565 All authors developed the initial analysis scheme at the 2019 GeneLab AWG workshop. EGO,  
566 ZZ, KSR, HF, WAdS, RB and JMG refined this into a draft pipeline. EGO and AMSB wrote and

567 validated the final processing scripts. EGO and AMSB wrote the original manuscript draft and  
568 generated figures. All authors reviewed and edited the final draft.  
569

### 570 **Declaration of Interests**

571 The authors declare no competing interests.

### 572 **Figure and Scheme Legends**

573 **Figure 1: GeneLab RNA-seq Consensus Pipeline (RCP).** **A:** The three broad steps of the RCP.  
574 The RCP handles: 1) Data preprocessing to trim sequencing adapters and to provide quality control  
575 metrics; 2) Data processing to map reads to the reference genome and quantify the number of read  
576 counts per gene; and 3) Differential gene expression calculation, which will provide a list of  
577 differentially expressed genes that can be sorted by adjusted p-value and log fold-change. **B:** The  
578 full RCP annotated with tools, input files, and output files.

579

580 **Figure 2: Data preprocessing (pipeline step 1): Quality control and trimming.** **A:** Data  
581 Preprocessing pipeline. FastQ files from Illumina base-calling software are quality checked using  
582 FastQC and MultiQC. Data is then trimmed using TrimGalore and are re-checked for quality; **B:**  
583 Flags used for FastQC program; **C:** Flags used for MultiQC program; **D:** Flags used for  
584 TrimGalore program; trimmed reads (\*fastq.gz) are then used as input data for FastQC (B)  
585 followed by MultiQC (C) to generate trimmed read quality metrics. Tool versions used to process  
586 each dataset are included in the RNA-seq processing protocol in the GLDS Repository.

587

588 **Figure 3: Data processing (pipeline step 2A): Read mapping.** **A:** Data processing pipeline.  
589 Trimmed reads are mapped to their reference genome and transcriptome with STAR. Gene counts  
590 are then quantified with RSEM; **B:** Flags used for generating the indexed STAR reference files;  
591 **C:** Flags used for mapping reads with STAR. Tool versions used to process each dataset are  
592 included in the RNA-seq processing protocol in the GLDS Repository.

593

594 **Figure 4: Data processing (pipeline step 2B): Gene quantification.** **A:** Data processing  
595 pipeline. Mapping results from STAR are quantified by RSEM; **B:** Parameters for RSEM indexed  
596 reference files generation; **C:** Parameters for quantifying gene and isoform counts with RSEM.  
597 Tool versions used to process each dataset are included in the RNA-seq processing protocol in  
598 the GLDS Repository.

599

600 **Figure 5: Differential gene expression calculation (pipeline step 3).** **A:** Data processing  
601 pipeline. The R program DESeq2 is run in order to determine which genes are differentially  
602 expressed between experimental conditions using gene count files from RSEM. **B:** Output files  
603 generated. The table columns distinguish which script produces each output. The columns  
604 distinguish how those output files are used.

605

606 **Figure 6. Global and differential gene expression in spaceflight versus ground control liver**  
607 **samples from GeneLab datasets.** **A, B:** Principal component analysis of global gene expression  
608 in spaceflight (FLT) and respective ground control (GC) liver samples from the A) Rodent  
609 Research 1 (RR-1) NASA Validation mission (GLDS-168) and B) RR-6 ISS-terminal mission  
610 (GLDS-245). Plots were generated using data in the normalized counts tables for each respective  
611 dataset on the NASA GeneLab Data Repository. **C, D:** Heatmaps showing the top 30 differentially  
612 expressed genes in spaceflight (FLT) versus ground control (GC) liver samples from the C) Rodent  
613 Research 1 (RR-1) NASA Validation mission (GLDS-168) and D) RR-6 ISS-terminal mission  
614 (GLDS-245). Heatmaps were generated using data in the differential expression tables for each  
615 respective dataset on the NASA GeneLab Data Repository and are colored by relative expression.  
616 Adj. p-value < 0.05 and  $|\log_2FC| > 1$ . All samples included were derived from frozen carcasses  
617 post-mission and utilized the ribo-depletion library preparation method.

618

619 **Table 1. Differential gene expression output table - Annotations.** Truncated version of the  
620 differential\_expression.csv file provided as GeneLab processed data for GLDS-251. The first 7  
621 columns of the differential gene expression output table contain gene IDs and annotations (for  
622 remainder of columns, refer to Table 2).

623

624 **Table 2. Differential gene expression output table - Statistics.** Truncated version of the  
625 differential\_expression.csv file provided as GeneLab processed data for GLDS-251. Following the  
626 7 columns of gene IDs and annotations (Table 1) are normalized gene expression data for each  
627 sample (**Norm. expr. (sample A)**) then results from all possible pairwise comparisons, including  
628 log2 fold change (**Log2fc (comparison A)**), p values (**P.value (comparison A)**), and adjusted p  
629 values (**Adj.p.value (comparison A)**) calculated from the Wald Tests. Next are the average gene  
630 expression (**Mean (all samples)**) and standard deviation (**Stdev (all samples)**) of all samples  
631 followed by the F-statistic p value generated from the likelihood ratio test (**LRT.p.value**), and the  
632 last set of columns are the average gene expressions (**Group.Mean**) and standard deviations  
633 (**Group.Stdev**) of samples within each group.

634

635 **Table 3. Comparison of gene ontology in spaceflight versus ground control liver samples**  
636 **from GeneLab datasets.** The number of enriched gene ontology (GO) terms identified by Gene  
637 Set Enrichment Analysis (GSEA, phenotype permutation) was evaluated in spaceflight (FLT)  
638 versus ground control (GC) liver samples from the Rodent Research 1 (RR-1) NASA Validation  
639 mission (GLDS-168), and RR-6 ISS-terminal mission (GLDS-245). For GO terms, the number on  
640 the left corresponds to GO terms enriched in FLT samples and the number on the right corresponds  
641 to GO terms enriched in GC samples. These data were generated using the normalized counts for  
642 each respective dataset on the NASA GeneLab Data Repository. All samples included were  
643 derived from frozen carcasses post-mission and utilized the ribo-depletion library preparation  
644 method. GLDS-168, FLT n=5 and GC n=5; GLDS-245, FLT n=10 and GC n=10. p values and  
645 FDR values are indicated.

646

647

648

649 **References**

- 650 Andrews, Simon, and Others. 2010. “FastQC: A Quality Control Tool for High Throughput  
651 Sequence Data.” Babraham Bioinformatics, Babraham Institute, Cambridge, United  
652 Kingdom.
- 653 Baruzzo, Giacomo, Katharina E. Hayer, Eun Ji Kim, Barbara Di Camillo, Garret A. FitzGerald,  
654 and Gregory R. Grant. 2017. “Simulation-Based Comprehensive Benchmarking of RNA-  
655 Seq Aligners.” *Nature Methods* 14 (2): 135–39.
- 656 Berrios, Daniel, Jonathan Galazka, Kirill Gorev, Samrawit Gebre, and Sylvain Costes. n.d.  
657 “Interfaces for the Exploration of Space Omics Data.” *Nucleic Acids Research*.
- 658 Bray, Nicolas L., Harold Pimentel, Páll Melsted, and Lior Pachter. 2016. “Near-Optimal  
659 Probabilistic RNA-Seq Quantification.” *Nature Biotechnology* 34 (5): 525–27.
- 660 Castro-Wallace, Sarah L., Charles Y. Chiu, Kristen K. John, Sarah E. Stahl, Kathleen H. Rubins,  
661 Alexa B. R. McIntyre, Jason P. Dworkin, et al. 2017. “Nanopore DNA Sequencing and  
662 Genome Assembly on the International Space Station.” *Scientific Reports* 7 (1): 18022.
- 663 Chen, Jing, Eric E. Bardes, Bruce J. Aronow, and Anil G. Jegga. 2009. “ToppGene Suite for  
664 Gene List Enrichment Analysis and Candidate Gene Prioritization.” *Nucleic Acids Research*  
665 37 (Web Server issue): W305–11.
- 666 Conesa, Ana, Pedro Madrigal, Sonia Tarazona, David Gomez-Cabrero, Alejandra Cervera,  
667 Andrew McPherson, Michał Wojciech Szczesniak, et al. 2016. “A Survey of Best Practices  
668 for RNA-Seq Data Analysis.” *Genome Biology* 17 (January): 13.
- 669 Costa-Silva, Juliana, Douglas Domingues, and Fabricio Martins Lopes. 2017. “RNA-Seq  
670 Differential Expression Analysis: An Extended Review and a Software Tool.” *PloS One* 12  
671 (12): e0190152.
- 672 Dobin, Alexander, Carrie A. Davis, Felix Schlesinger, Jorg Drenkow, Chris Zaleski, Sonali Jha,  
673 Philippe Batut, Mark Chaisson, and Thomas R. Gingeras. 2013. “STAR: Ultrafast Universal  
674 RNA-Seq Aligner.” *Bioinformatics* 29 (1): 15–21.
- 675 ENCODE Project Consortium, Michael P. Snyder, Thomas R. Gingeras, Jill E. Moore, Zhiping  
676 Weng, Mark B. Gerstein, Bing Ren, et al. 2020. “Perspectives on ENCODE.” *Nature* 583  
677 (7818): 693–98.
- 678 Ewels, Philip, Måns Magnusson, Sverker Lundin, and Max Källér. 2016. “MultiQC: Summarize

- 679 Analysis Results for Multiple Tools and Samples in a Single Report.” *Bioinformatics* 32  
680 (19): 3047–48.
- 681 “FGED: MINSEQE.” n.d. Accessed September 4, 2020. <http://fged.org/projects/minseqe/>.
- 682 Gentleman, Robert C., Vincent J. Carey, Douglas M. Bates, Ben Bolstad, Marcel Dettling,  
683 Sandrine Dudoit, Byron Ellis, et al. 2004. “Bioconductor: Open Software Development for  
684 Computational Biology and Bioinformatics.” *Genome Biology* 5 (10): R80.
- 685 Huber, Wolfgang, Vincent J. Carey, Robert Gentleman, Simon Anders, Marc Carlson, Benilton  
686 S. Carvalho, Hector Corrada Bravo, et al. 2015. “Orchestrating High-Throughput Genomic  
687 Analysis with Bioconductor.” *Nature Methods* 12 (2): 115–21.
- 688 Jain, Miten, Hugh E. Olsen, Benedict Paten, and Mark Akeson. 2016. “Erratum to: The Oxford  
689 Nanopore MinION: Delivery of Nanopore Sequencing to the Genomics Community.”  
690 *Genome Biology* 17 (1): 256.
- 691 Jiang, L., F. Schlesinger, C. A. Davis, Y. Zhang, R. Li, M. Salit, T. R. Gingeras, and B. Oliver.  
692 2011. “Synthetic Spike-in Standards for RNA-Seq Experiments.” *Genome Research*.  
693 <https://doi.org/10.1101/gr.121095.111>.
- 694 Krueger, Felix. 2019. *Trim Galore: A Wrapper around Cutadapt and FastQC to Consistently*  
695 *Apply Adapter and Quality Trimming to FastQ Files, with Extra Functionality for RRBS*  
696 *Data* (version Version 0.6.5). <https://github.com/FelixKrueger/TrimGalore>.
- 697 Langmead, Ben, Cole Trapnell, Mihai Pop, and Steven L. Salzberg. 2009. “Ultrafast and  
698 Memory-Efficient Alignment of Short DNA Sequences to the Human Genome.” *Genome*  
699 *Biology* 10 (3): R25.
- 700 Law, Charity W., Monther Alhamdoosh, Shian Su, Xueyi Dong, Luyi Tian, Gordon K. Smyth,  
701 and Matthew E. Ritchie. 2016. “RNA-Seq Analysis Is Easy as 1-2-3 with Limma, Glimma  
702 and edgeR.” *F1000Research* 5 (June). <https://doi.org/10.12688/f1000research.9005.3>.
- 703 Liao, Yuxing, Jing Wang, Eric J. Jaehnig, Zhiao Shi, and Bing Zhang. 2019. “WebGestalt 2019:  
704 Gene Set Analysis Toolkit with Revamped UIs and APIs.” *Nucleic Acids Research* 47  
705 (W1): W199–205.
- 706 Li, Bo, and Colin N. Dewey. 2011. “RSEM: Accurate Transcript Quantification from RNA-Seq  
707 Data with or without a Reference Genome.” *BMC Bioinformatics* 12 (August): 323.
- 708 Li, H., and R. Durbin. 2009. “Fast and Accurate Short Read Alignment with Burrows-Wheeler  
709 Transform.” *Bioinformatics*. <https://doi.org/10.1093/bioinformatics/btp324>.



- 710 Love, Michael I., Wolfgang Huber, and Simon Anders. 2014. “Moderated Estimation of Fold  
711 Change and Dispersion for RNA-Seq Data with DESeq2.” *Genome Biology* 15 (12): 550.
- 712 Martin, Marcel. 2011. “Cutadapt Removes Adapter Sequences from High-Throughput  
713 Sequencing Reads.” *EMBnet.journal* 17 (1): 10–12.
- 714 McIntyre, Lauren M., Kenneth K. Lopiano, Alison M. Morse, Victor Amin, Ann L. Oberg, Linda  
715 J. Young, and Sergey V. Nuzhdin. 2011. “RNA-Seq: Technical Variability and Sampling.”  
716 *BMC Genomics* 12 (June): 293.
- 717 Mi, Huaiyu, Anushya Muruganujan, and Paul D. Thomas. 2013. “PANTHER in 2013: Modeling  
718 the Evolution of Gene Function, and Other Gene Attributes, in the Context of Phylogenetic  
719 Trees.” *Nucleic Acids Research* 41 (Database issue): D377–86.
- 720 Munro, Sarah A., Steven P. Lund, P. Scott Pine, Hans Binder, Djork-Arné Clevert, Ana Conesa,  
721 Joaquin Dopazo, et al. 2014. “Assessing Technical Performance in Differential Gene  
722 Expression Experiments with External Spike-in RNA Control Ratio Mixtures.” *Nature*  
723 *Communications* 5 (September): 5125.
- 724 Nguyen, Tuan-Minh, Adib Shafi, Tin Nguyen, and Sorin Draghici. 2019. “Identifying  
725 Significantly Impacted Pathways: A Comprehensive Review and Assessment.” *Genome*  
726 *Biology* 20 (1): 203.
- 727 Patro, Rob, Geet Duggal, Michael I. Love, Rafael A. Irizarry, and Carl Kingsford. 2017.  
728 “Salmon Provides Fast and Bias-Aware Quantification of Transcript Expression.” *Nature*  
729 *Methods* 14 (4): 417–19.
- 730 Polo, San-Huei Lai, Amanda M. Saravia-Butler, Valery Boyko, Marie T. Dinh, Yi-Chun Chen,  
731 Homer Fogle, Sigrid S. Reinsch, et al. 2020. “RNAseq Analysis of Rodent Spaceflight  
732 Experiments Is Confounded by Sample Collection Techniques.”  
733 <https://doi.org/10.1101/2020.07.18.209775>.
- 734 Raplee, Isaac D., Alexei V. Evsikov, and Caralina Marín de Evsikova. 2019. “Aligning the  
735 Aligners: Comparison of RNA Sequencing Data Alignment and Gene Expression  
736 Quantification Tools for Clinical Breast Cancer Research.” *Journal of Personalized*  
737 *Medicine* 9 (2). <https://doi.org/10.3390/jpm9020018>.
- 738 Risso, Davide, John Ngai, Terence P. Speed, and Sandrine Dudoit. 2014. “Normalization of  
739 RNA-Seq Data Using Factor Analysis of Control Genes or Samples.” *Nature Biotechnology*  
740 32 (9): 896–902.

- 741 Risso, Davide, Katja Schwartz, Gavin Sherlock, and Sandrine Dudoit. 2011. “GC-Content  
742 Normalization for RNA-Seq Data.” *BMC Bioinformatics* 12 (December): 480.
- 743 Roberts, Richard J., Mauricio O. Carneiro, and Michael C. Schatz. 2013. “The Advantages of  
744 SMRT Sequencing.” *Genome Biology* 14 (7): 405.
- 745 Rocca-Serra, P., M. Brandizi, E. Maguire, N. Sklyar, C. Taylor, K. Begley, D. Field, et al. 2010.  
746 “ISA Software Suite: Supporting Standards-Compliant Experimental Annotation and  
747 Enabling Curation at the Community Level.” *Bioinformatics*.  
748 <https://doi.org/10.1093/bioinformatics/btq415>.
- 749 Rutter, Lindsay, Richard Barker, Daniela Bezdán, Henry Cope, Sylvain V. Costes, Lovorka  
750 Degoricija, Kathleen M. Fisch, et al. n.d. “A New Era for Space Life Science: International  
751 Standards for Space Omics Processing (ISSOP).” *Cell*. Accessed August 26, 2020.  
752 [https://drive.google.com/drive/u/0/folders/1BQ72FMIHZ\\_GR777KaZ6nCL3uTe4Q07x4](https://drive.google.com/drive/u/0/folders/1BQ72FMIHZ_GR777KaZ6nCL3uTe4Q07x4).
- 753 Sansone, Susanna-Assunta, Philippe Rocca-Serra, Dawn Field, Eamonn Maguire, Chris Taylor,  
754 Oliver Hofmann, Hong Fang, et al. 2012. “Toward Interoperable Bioscience Data.” *Nature*  
755 *Genetics* 44 (2): 121–26.
- 756 Schaarschmidt, Stephanie, Axel Fischer, Ellen Zuther, and Dirk K. Hincha. 2020. “Evaluation of  
757 Seven Different RNA-Seq Alignment Tools Based on Experimental Data from the Model  
758 Plant *Arabidopsis thaliana*.” *International Journal of Molecular Sciences* 21 (5).  
759 <https://doi.org/10.3390/ijms21051720>.
- 760 Schurch, Nicholas J., Pietá Schofield, Marek Gierliński, Christian Cole, Alexander Sherstnev,  
761 Vijender Singh, Nicola Wrobel, et al. 2016. “How Many Biological Replicates Are Needed  
762 in an RNA-Seq Experiment and Which Differential Expression Tool Should You Use?”  
763 *RNA*. <https://doi.org/10.1261/rna.053959.115>.
- 764 Scott, Ryan T., Kirill Grigorev, Graham Mackintosh, Samrawit G. Gebre, Christopher E. Mason,  
765 Martha E. Del Alto, and Sylvain V. Costes. 2020. “Advancing the Integration of  
766 Biosciences Data Sharing to Further Enable Space Exploration.” *Cell Reports*.
- 767 Smith, Tom, Andreas Heger, and Ian Sudbery. 2017. “UMI-Tools: Modeling Sequencing Errors  
768 in Unique Molecular Identifiers to Improve Quantification Accuracy.” *Genome Research* 27  
769 (3): 491–99.
- 770 Sonesson, C., M. Love, and M. Robinson. n.d. “Differential Analyses for RNA-Seq: Transcript-  
771 Level Estimates Improve Gene-Level Inferences [version 2; Peer Review: 2 Approved].”

- 772 F1000Research.
- 773 Subramanian, Aravind, Pablo Tamayo, Vamsi K. Mootha, Sayan Mukherjee, Benjamin L. Ebert,  
774 Michael A. Gillette, Amanda Paulovich, et al. 2005. “Gene Set Enrichment Analysis: A  
775 Knowledge-Based Approach for Interpreting Genome-Wide Expression Profiles.”  
776 *Proceedings of the National Academy of Sciences of the United States of America* 102 (43):  
777 15545–50.
- 778 Szklarczyk, D., A. L. Gable, D. Lyon, and A. Junge. 2019. “STRING v11: Protein–protein  
779 Association Networks with Increased Coverage, Supporting Functional Discovery in  
780 Genome-Wide Experimental Datasets.” *Nucleic Acids*.  
781 <https://academic.oup.com/nar/article-abstract/47/D1/D607/5198476>.
- 782 Teng, Mingxiang, Michael I. Love, Carrie A. Davis, Sarah Djebali, Alexander Dobin, Brenton R.  
783 Graveley, Sheng Li, et al. 2016. “A Benchmark for RNA-Seq Quantification Pipelines.”  
784 *Genome Biology* 17 (April): 74.
- 785 Thomas, P. D. 2003. “PANTHER: A Library of Protein Families and Subfamilies Indexed by  
786 Function.” *Genome Research*. <https://doi.org/10.1101/gr.772403>.
- 787 Våremo, Leif, Jens Nielsen, and Intawat Nookaew. 2013. “Enriching the Gene Set Analysis of  
788 Genome-Wide Data by Incorporating Directionality of Gene Expression and Combining  
789 Statistical Hypotheses and Methods.” *Nucleic Acids Research* 41 (8): 4378–91.
- 790 Wickham, Hadley, Danielle Navarro, and Thomas Lin Pedersen. 2016. *ggplot2: Elegant*  
791 *Graphics for Data Analysis*. Springer-Verlag New York.
- 792 Williams, Claire R., Alyssa Baccarella, Jay Z. Parrish, and Charles C. Kim. 2016. “Trimming of  
793 Sequence Reads Alters RNA-Seq Gene Expression Estimates.” *BMC Bioinformatics* 17  
794 (February): 103.
- 795 Wu, Douglas C., Jun Yao, Kevin S. Ho, Alan M. Lambowitz, and Claus O. Wilke. 2018.  
796 “Limitations of Alignment-Free Tools in Total RNA-Seq Quantification.” *BMC Genomics*  
797 19 (1): 510.
- 798 Yang, Cheng, Po-Yen Wu, Li Tong, John H. Phan, and May D. Wang. 2015. “The Impact of  
799 RNA-Seq Aligners on Gene Expression Estimation.” ACM-BThe ACM Conference on  
800 Bioinformatics, Computational Biology and Biomedicine. ACM Conference on  
801 Bioinformatics, Computational Biology and Biomedicine (September): 462–71.

802

# Figures

## **NASA GeneLab RNA-seq Consensus Pipeline: Standardized Processing of Short-Read RNA- Seq Data**

Overbey et al. (2020)

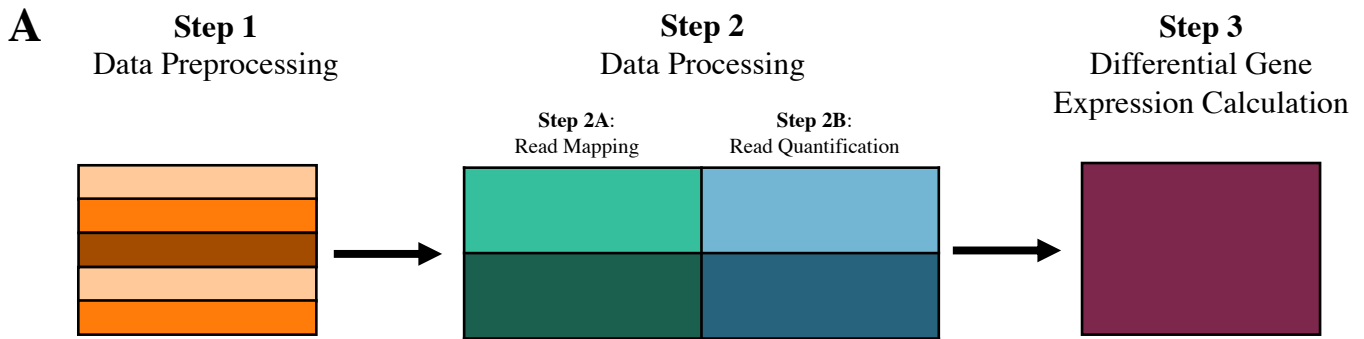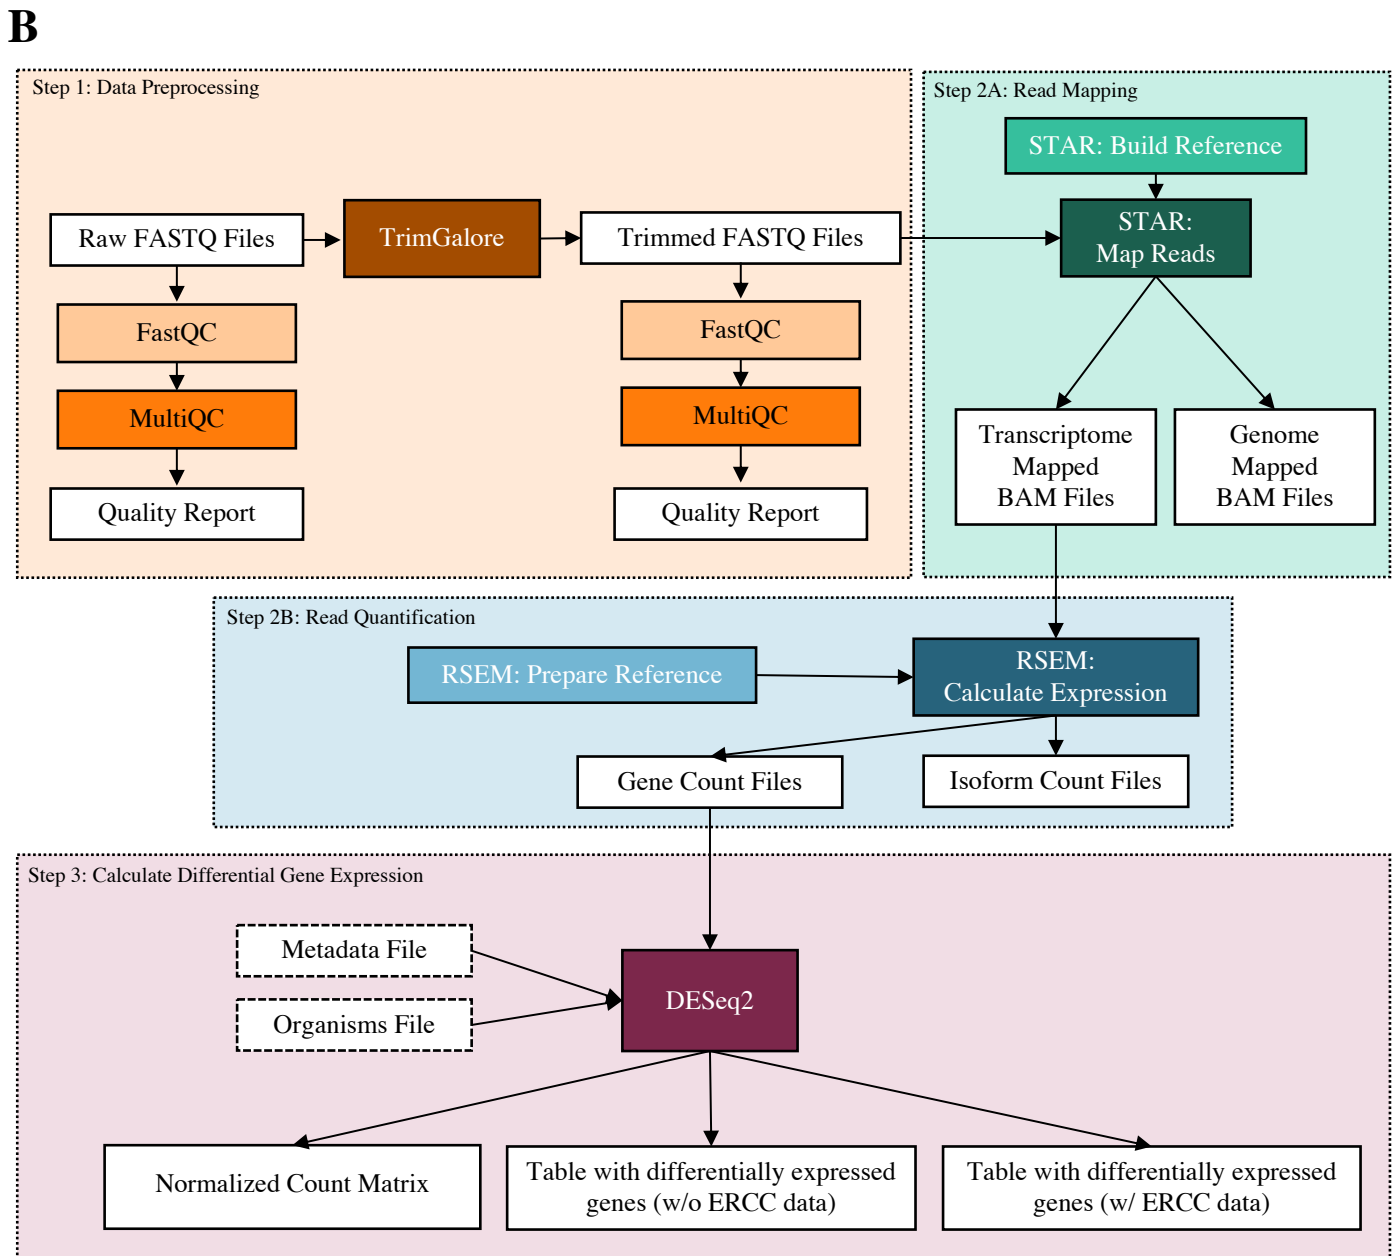

**Figure 1: GeneLab RNA-seq Consensus Pipeline (RCP).** **A:** The three broad steps of the RCP. The RCP handles: 1) Data preprocessing to trim sequencing adapters and to provide quality control metrics; 2) Data processing to map reads to the reference genome and quantify the number of read counts per gene; and 3) Differential gene expression calculation, which will provide a list of differentially expressed genes that can be sorted by adjusted p-value and log fold-change. **B:** The full RCP annotated with tools, input files, and output files.

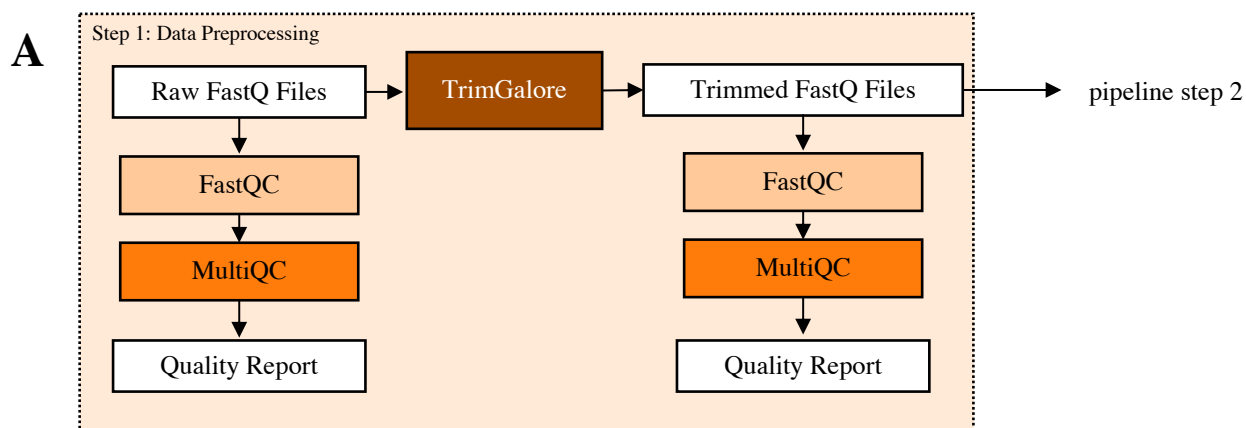

**B**

| FastQC                   |                                                                                         |
|--------------------------|-----------------------------------------------------------------------------------------|
| <b>Parameters</b>        | fastqc -o /path/to/output/directory \<br>-t number_of_threads \<br>/path/to/input/files |
| <b>Input data files</b>  | fastq.gz                                                                                |
| <b>Output data files</b> | fastqc.html (FastQC report)<br>fastqc.zip (FastQC raw data)                             |

**C**

| MultiQC                  |                                                                                              |
|--------------------------|----------------------------------------------------------------------------------------------|
| <b>Parameters</b>        | multiqc -o /path/to/output/directory \<br>/path/to/fastqc/output/files                       |
| <b>Input data files</b>  | fastqc.html (FastQC report)<br>fastqc.zip (FastQC raw data)                                  |
| <b>Output data files</b> | multiqc_report.html (multiqc report)<br>multiqc_data (directory containing multiqc raw data) |

**D**

| TrimGalore               |                                                                                                                                                                                                                                                                                                                                                                         |
|--------------------------|-------------------------------------------------------------------------------------------------------------------------------------------------------------------------------------------------------------------------------------------------------------------------------------------------------------------------------------------------------------------------|
| <b>Parameters</b>        | trim_galore --gzip \<br>--path_to_cutadapt /path/to/cutadapt \<br>--phred33 \<br>--illumina \ # if adapters are not illumina, replace with adapters used<br>--output_dir /path/to/TrimGalore/output/directory \<br>--paired \ # only for PE studies<br>/path/to/forward/reads /path/to/reverse/reads<br># if SE, replace the last line with only /path/to/forward/reads |
| <b>Input data files</b>  | *fastq.gz (raw reads)                                                                                                                                                                                                                                                                                                                                                   |
| <b>Output data files</b> | *fastq.gz (trimmed reads)<br>*trimming_report.txt (trimming report)                                                                                                                                                                                                                                                                                                     |

**Figure 2: Data preprocessing (pipeline step 1): Quality control and trimming.** **A:** Data Preprocessing pipeline. FastQ files from Illumina base-calling software are quality checked using FastQC and MultiQC. Data is then trimmed using TrimGalore and are re-checked for quality; **B:** Flags used for FastQC program; **C:** Flags used for MultiQC program; **D:** Flags used for TrimGalore program; trimmed reads (\*fastq.gz) are then used as input data for FastQC (B) followed by MultiQC (C) to generate trimmed read quality metrics. Tool versions used to process each dataset are included in the RNA-seq processing protocol in the GLDS Repository.

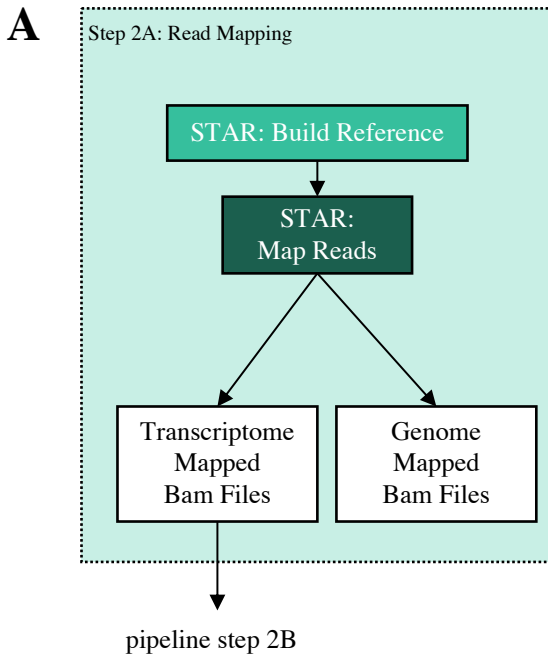

**B**

| STAR                     | Build Reference                                                                                                                                                                                                                                                                                                                                                                                                                                                     |
|--------------------------|---------------------------------------------------------------------------------------------------------------------------------------------------------------------------------------------------------------------------------------------------------------------------------------------------------------------------------------------------------------------------------------------------------------------------------------------------------------------|
| <b>Parameters</b>        | STAR --runThreadN NumberOfThreads \# Number of available cores on server node<br>--runMode genomeGenerate \<br>--limitGenomeGenerateRAM 3500000000 \<br># min needed for mouse ref<br>--genomeDir /path/to/STAR/genome/directory \<br>--genomeFastaFiles /path/to/genome/fasta/file \<br>--sjdbGTFfile /path/to/annotation/gtf/file \<br>--sjdbOverhang ReadLength-1                                                                                                |
| <b>Input data files</b>  | .fasta (genome sequences)<br>.gtf (genome annotation)<br>Note that for analyzing samples with ERCC spike-in, the genome fasta and gtf files should have the ERCC fasta and gtf files appended them.                                                                                                                                                                                                                                                                 |
| <b>Output data files</b> | The following will be generated in the /STAR/genome/directory: <ul style="list-style-type: none"> <li>chrLength.txt</li> <li>chrNameLength.txt</li> <li>chrName.txt</li> <li>chrStart.txt</li> <li>exonGeTrInfo.tab</li> <li>exonInfo.tab</li> <li>geneInfo.tab</li> <li>Genome</li> <li>genomeParameters.txt</li> <li>SA</li> <li>SAindex</li> <li>sjdbInfo.txt</li> <li>sjdbList.fromGTF.out.tab</li> <li>sjdbList.out.tab</li> <li>transcriptInfo.tab</li> </ul> |

**C**

| STAR                     | Map Reads                                                                                                                                                                                                                                                                                                                                                                                                                                                                                                                                                                                                                                                                                                                                                                                                                                                                                                                    |
|--------------------------|------------------------------------------------------------------------------------------------------------------------------------------------------------------------------------------------------------------------------------------------------------------------------------------------------------------------------------------------------------------------------------------------------------------------------------------------------------------------------------------------------------------------------------------------------------------------------------------------------------------------------------------------------------------------------------------------------------------------------------------------------------------------------------------------------------------------------------------------------------------------------------------------------------------------------|
| <b>Parameters</b>        | STAR --twopassMode Basic \<br>--limitBAMsortRAM available_memory_in_bytes \<br>--genomeDir /path/to/STAR/genome/directory \<br>--outSAMunmapped Within \<br>--outFilterType BySJout \<br>--outSAMattributes NH HI AS NM MD MC \<br>--outFilterMultimapNmax 20 \<br>--outFilterMismatchNmax 999 \<br>--outFilterMismatchNoverReadLmax 0.04 \<br>--alignIntronMin 20 \<br>--alignIntronMax 1000000 \<br>--alignMatesGapMax 1000000 \# only needed for PE studies<br>--alignSJoverhangMin 8 \<br>--alignSJDBoverhangMin 1 \<br>--sjdbScore 1 \<br>--readFilesCommand zcat \<br>--runThreadN NumberOfThreads \<br>--outSAMtype BAM SortedByCoordinate \<br>--quantMode TranscriptomeSAM \<br>--outSAMheaderHD @HD VN:1.4 SO:coordinate \<br>--outFileNamePrefix /path/to/STAR-output/directory/<sample_name> \<br>--readFilesIn /path/to/trimmed_forward_reads \<br>/path/to/trimmed_reverse_reads \# only needed for PE studies |
| <b>Input data files</b>  | STAR index directory<br>*fastq.gz (trimmed reads)                                                                                                                                                                                                                                                                                                                                                                                                                                                                                                                                                                                                                                                                                                                                                                                                                                                                            |
| <b>Output data files</b> | Files <ul style="list-style-type: none"> <li>*Aligned.sortedByCoord.out.bam (sorted mapping to genome)</li> <li>*Aligned.toTranscriptome.out.bam (sorted mapping to transcriptome)</li> <li>*Log.final.out (reads mapped, etc)</li> <li>*Log.out</li> <li>*Log.progress.out</li> <li>*SJ.out.tab</li> </ul> Directories <ul style="list-style-type: none"> <li>*_STARgenome</li> <li>sjdbInfo.txt</li> <li>sjdbList.out.tab</li> <li>*_STARpass1</li> <li>Log.final.out</li> <li>SJ.out.tab</li> <li>*_STARtmp</li> </ul> directory containing subdirectories that are empty – this was the location for temp files that were automatically removed after successful completion                                                                                                                                                                                                                                              |

**Figure 3: Data processing (pipeline step 2A): Read mapping.** **A:** Data processing pipeline. Trimmed reads are mapped to their reference genome and transcriptome with STAR. Gene counts are then quantified with RSEM; **B:** Flags used for generating the indexed STAR reference files; **C:** Flags used for mapping reads with STAR. Tool versions used to process each dataset are included in the RNA-seq processing protocol in the GLDS Repository.

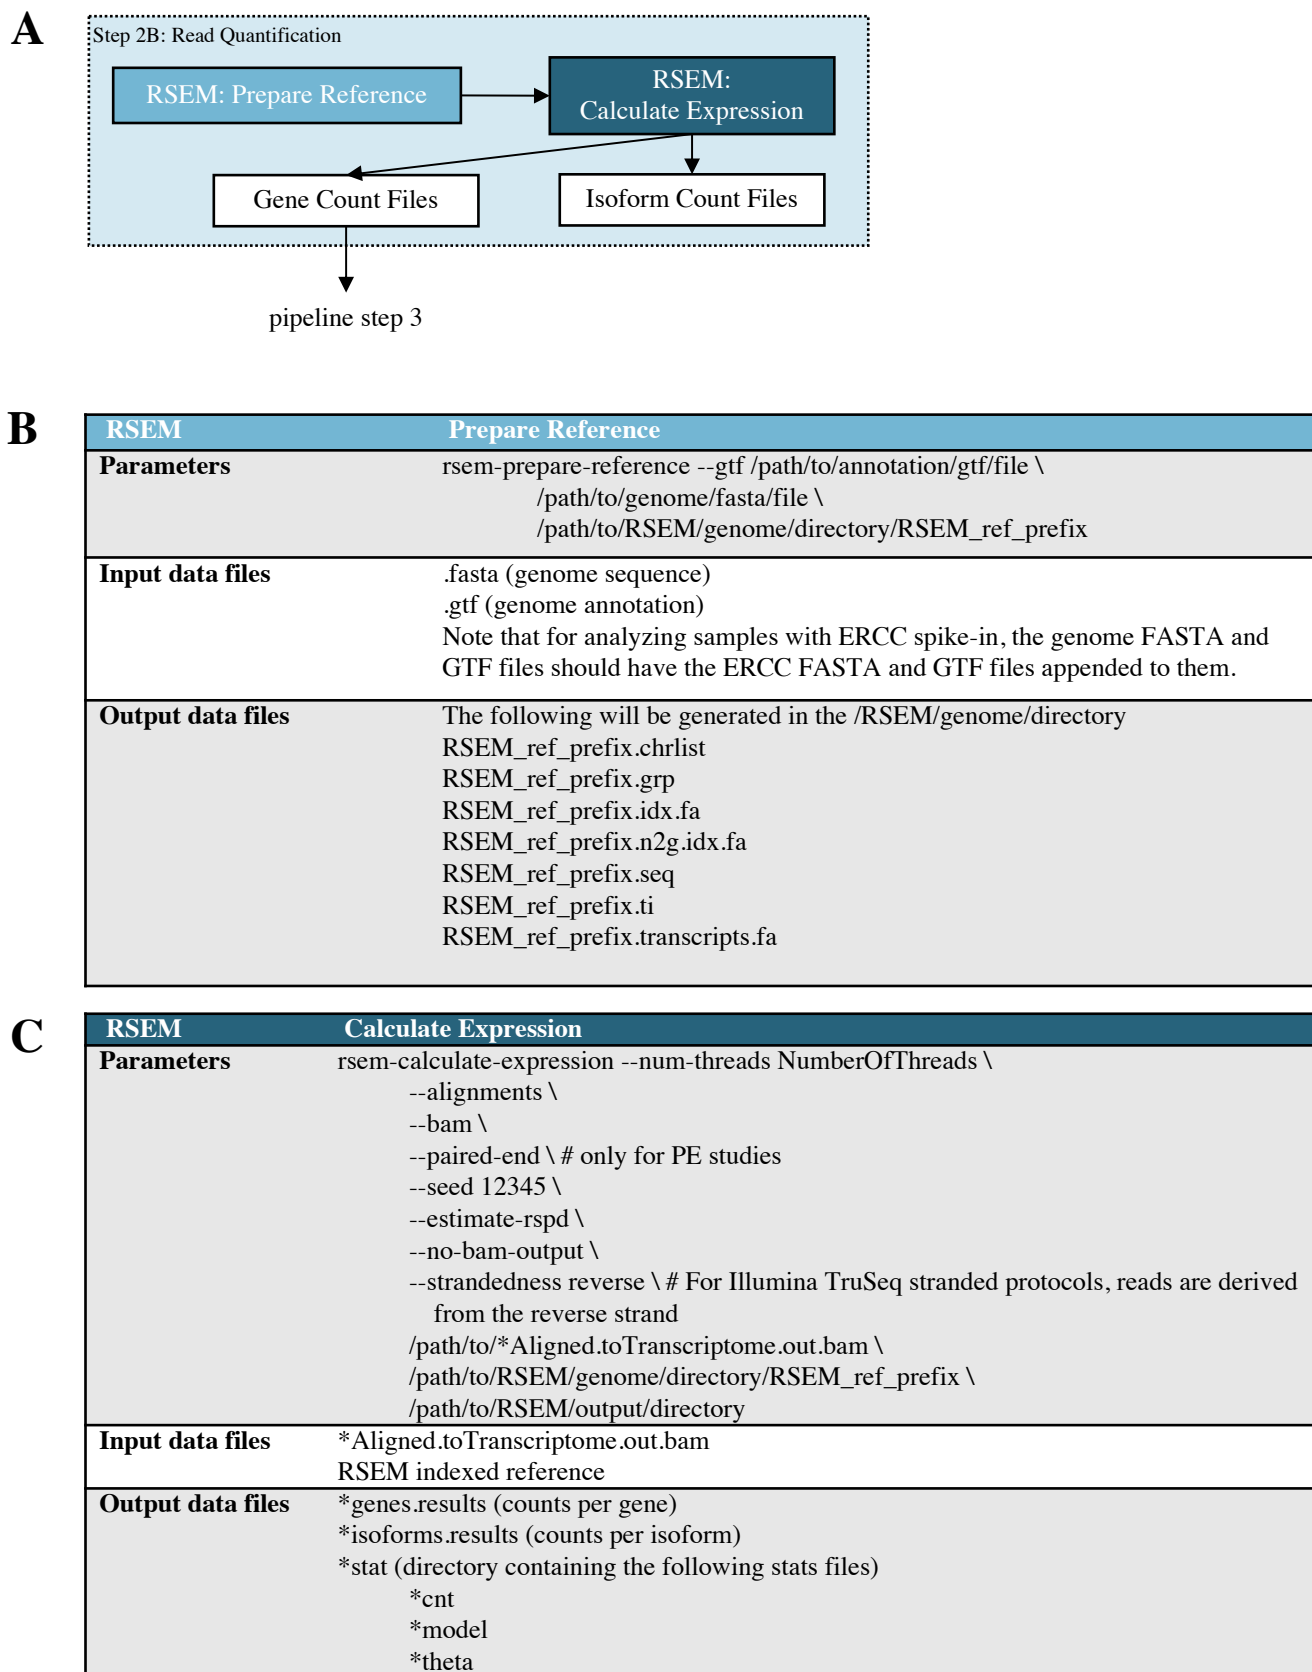

**Figure 4: Data processing (pipeline step 2B): Gene quantification.** **A:** Data processing pipeline. Mapping results from STAR are quantified by RSEM; **B:** Parameters for RSEM indexed reference files generation; **C:** Parameters for quantifying gene and isoform counts with RSEM. Tool versions used to process each dataset are included in the RNA-seq processing protocol in the GLDS Repository.



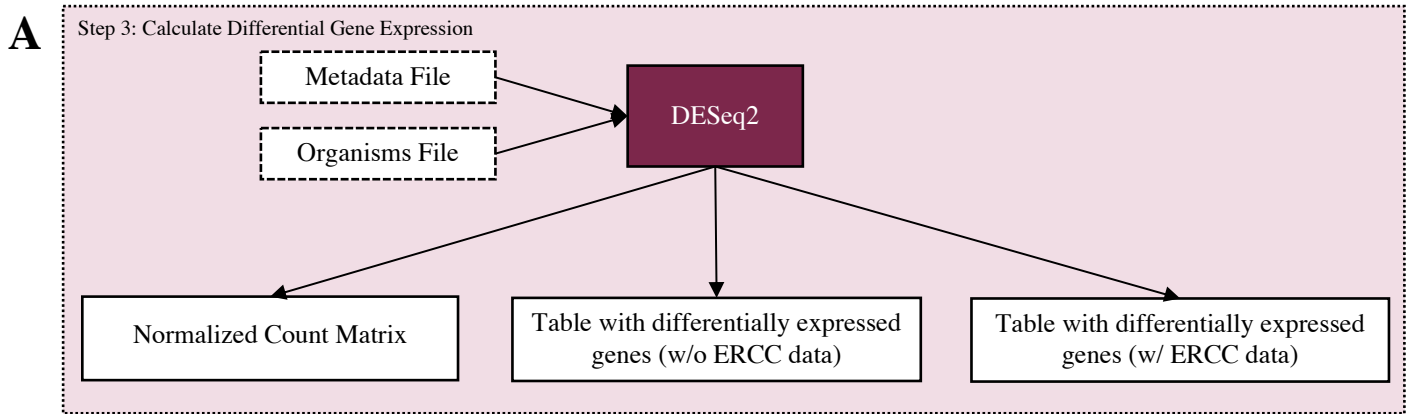

**B**

| Output Type                                                                                          | Output File Name<br>(GeneLab_DGE_noERCC.R<br>and<br>GeneLab_DGE_wERCC.R)                         | Output File Name<br>(GeneLab_DGE_wERCC.R only)                                               |
|------------------------------------------------------------------------------------------------------|--------------------------------------------------------------------------------------------------|----------------------------------------------------------------------------------------------|
| Available with RNA-seq processed data in the GLDS Repository (*)                                     | Unnormalized_Counts.csv<br>Normalized_Counts.csv<br>contrasts.csv<br>differential_expression.csv | ERCCnorm_contrasts.csv<br>ERCC_Normalized_Counts.csv<br>ERCCnorm_differential_expression.csv |
| Used to generate interactive plots from RNA-seq processed data in the GLDS visualization portal (**) | visualization_output_table.csv<br>visualization_PCA_table.csv                                    | visualization_output_table_ERCCnorm.csv<br>visualization_PCA_table_ERCCnorm.csv              |
| Used for internal QC and/or V&V (#)                                                                  | SampleTable.csv                                                                                  | ERCC_rawCounts_unfiltered.csv<br>ERCC_rawCounts_filtered.csv                                 |

**Figure 5: Differential gene expression calculation (pipeline step 3).** **A:** Data processing pipeline. The R program DESeq2 is run in order to determine which genes are differentially expressed between experimental conditions using gene count files from RSEM. **B:** Output files generated. The table columns distinguish which script produces each output. The columns distinguish how those output files are used.

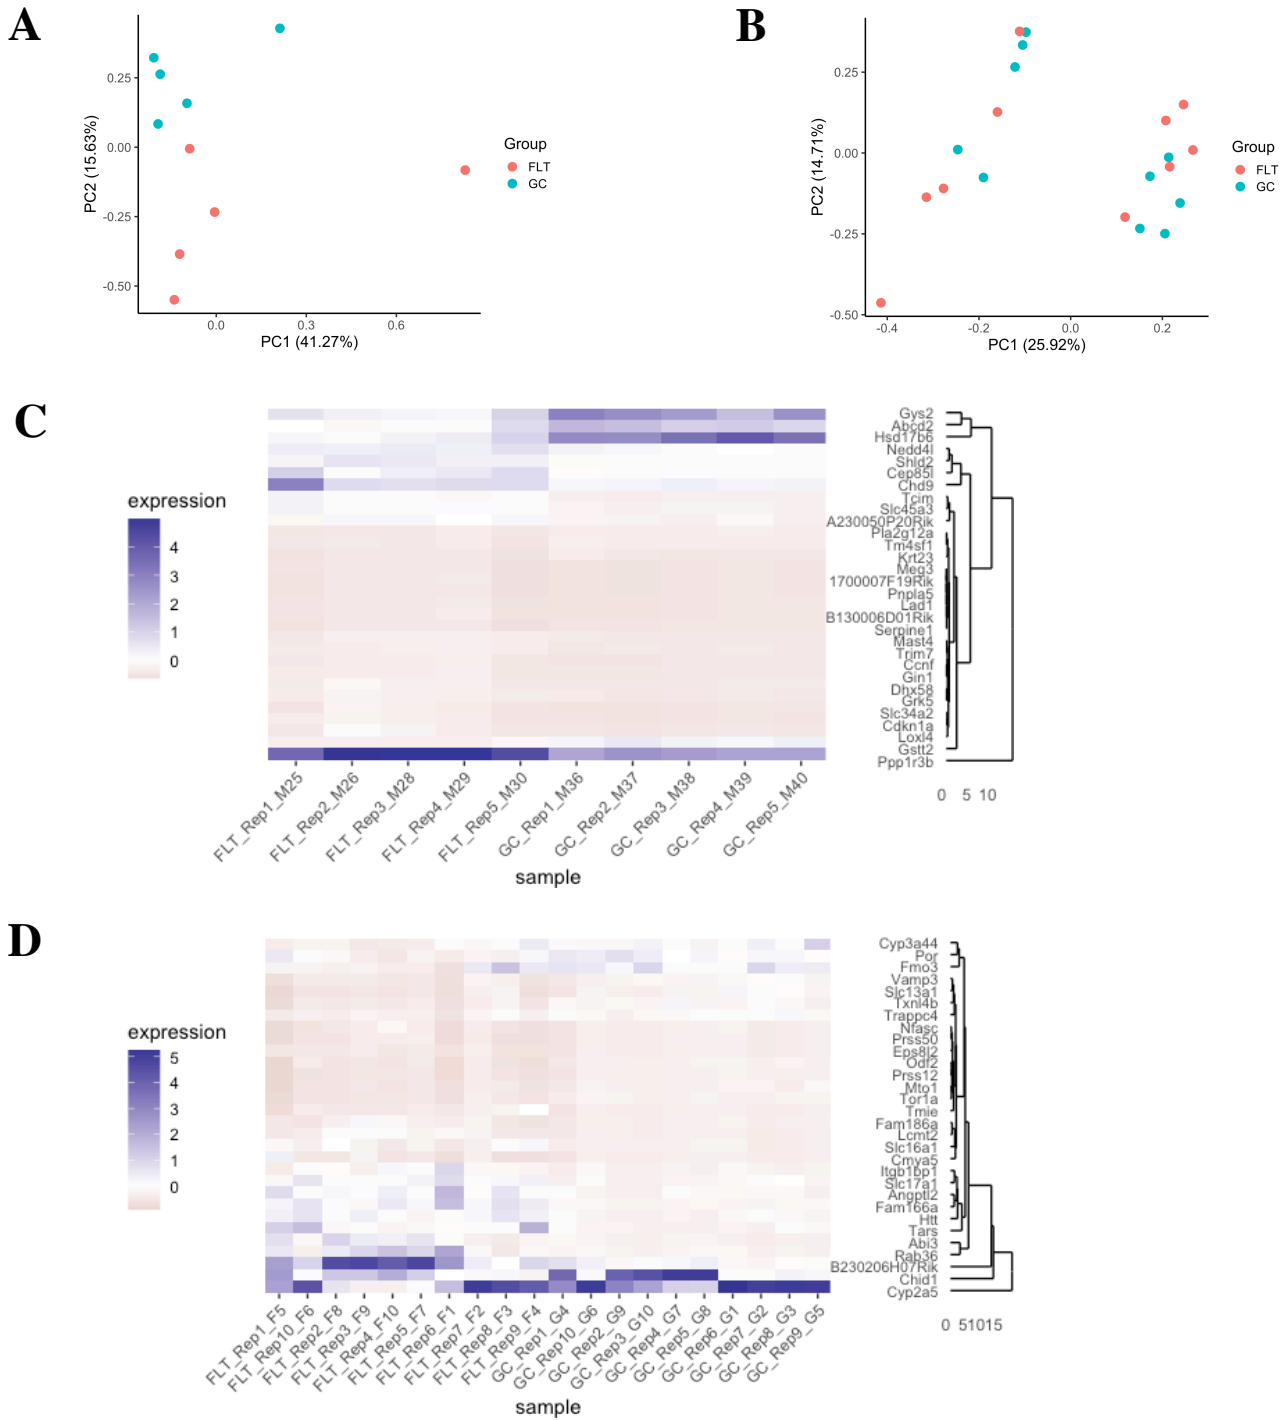

**Figure 6. Global and differential gene expression in spaceflight versus ground control liver samples from GeneLab datasets. A, B:** Principal component analysis of global gene expression in spaceflight (FLT) and respective ground control (GC) liver samples from the A) Rodent Research 1 (RR-1) NASA Validation mission (GLDS-168) and B) RR-6 ISS-terminal mission (GLDS-245). Plots were generated using data in the normalized counts tables for each respective dataset on the NASA GeneLab Data Repository. **C, D:** Heatmaps showing the top 30 differentially expressed genes in spaceflight (FLT) versus ground control (GC) liver samples from the C) Rodent Research 1 (RR-1) NASA Validation mission (GLDS-168) and D) RR-6 ISS-terminal mission (GLDS-245). Heatmaps were generated using data in the differential expression tables for each respective dataset on the NASA GeneLab Data Repository and is colored by relative expression. Adj. p-value < 0.05 and  $|\log_2\text{FC}| > 1$ . All samples included were derived from frozen carcasses post-mission and utilized the ribo-depletion library preparation method.

| TAIR      | SYMBOL  | GENENAME                   | REFSEQ       | ENTREZID | STRING_id        | GOSLIM_IDS                     |
|-----------|---------|----------------------------|--------------|----------|------------------|--------------------------------|
| AT1G01010 | ANAC001 | NA                         | NM_099983    | 839580   | 3702.AT1G01010.1 | NA                             |
| AT1G01020 | ARV1    | NA                         | NM_001035846 | 839569   | 3702.AT1G01020.1 | GO:0005622,<br>GO:0005737, ... |
| AT1G01030 | NGA3    | NA                         | NM_001331244 | 839321   | 3702.AT1G01030.1 | NA                             |
| AT1G01040 | ASU1    | Encodes a Dicer homolog... | NM_001197952 | 839574   | 3702.AT1G01040.2 | NA                             |

**Table 1. Differential gene expression output table - Annotations.** Truncated version of the differential\_expression.csv file provided as GeneLab processed data for GLDS-251. The first 7 columns of the differential gene expression output table contain gene IDs and annotations (for remainder of columns, refer to Table 2).

| <b>Norm. expr. (sample A)</b> | <b>Log2fc (comparison A)</b> | <b>P.value (comparison A)</b> | <b>Adj.p.value (comparison A)</b> | <b>Mean (all samples)</b> | <b>Stdev (all samples)</b> | <b>LRT p.value</b> | <b>Mean (group A)</b> | <b>Stdev (group A)</b> |
|-------------------------------|------------------------------|-------------------------------|-----------------------------------|---------------------------|----------------------------|--------------------|-----------------------|------------------------|
| 263.864                       | -0.078                       | 0.648                         | 0.848                             | 198.735                   | 31.756                     | 0.484              | 225.550               | 36.759                 |
| 200.493                       | 0.341                        | 0.033                         | 0.198                             | 147.061                   | 19.197                     | 0.740              | 174.839               | 24.073                 |
| 19.040                        | 0.691                        | 0.137                         | NA                                | 11.035                    | 3.121                      | NA                 | 15.706                | 2.889                  |
| 644.811                       | 0.126                        | 0.366                         | 0.655                             | 669.586                   | 68.327                     | 1.000              | 688.123               | 76.969                 |

**Table 2. Differential gene expression output table - Statistics.** Truncated version of the differential\_expression.csv file provided as GeneLab processed data for GLDS-251. Following the 7 columns of gene IDs and annotations (Table 1) are normalized gene expression data for each sample (**Norm. expr. (sample A)**) then results from all possible pairwise comparisons, including log2 fold change (**Log2fc (comparison A)**), p values (**P.value (comparison A)**), and adjusted p values (**Adj.p.value (comparison A)**) calculated from the Wald Tests. Next are the average gene expression (**Mean (all samples)**) and standard deviation (**Stdev (all samples)**) of all samples followed by the F-statistic p value generated from the likelihood ratio test (**LRT.p.value**), and the last set of columns are the average gene expressions (**Group.Mean**) and standard deviations (**Group.Stdev**) of samples within each group.

| GeneLab Dataset | # Enriched GO terms<br>(NOM p<0.01) | # Enriched GO terms<br>(NOM p<0.01 &<br>FDR<0.5) | # Enriched GO terms<br>(NOM p<0.01 &<br>FDR<0.25) |
|-----------------|-------------------------------------|--------------------------------------------------|---------------------------------------------------|
| GLDS-168        | 71, 135                             | 0, 132                                           | 0, 0                                              |
| GLDS-245        | 21, 24                              | 2, 6                                             | 1, 0                                              |

**Table 3. Comparison of gene ontology in spaceflight versus ground control liver samples from GeneLab datasets.** The number of enriched gene ontology (GO) terms identified by Gene Set Enrichment Analysis (GSEA, phenotype permutation) was evaluated in spaceflight (FLT) versus ground control (GC) liver samples from the Rodent Research 1 (RR-1) NASA Validation mission (GLDS-168), and RR-6 ISS-terminal mission (GLDS-245). For GO terms, the number on the left corresponds to GO terms enriched in FLT samples and the number on the right corresponds to GO terms enriched in GC samples. These data were generated using the normalized counts for each respective dataset on the NASA GeneLab Data Repository. All samples included were derived from frozen carcasses post-mission and utilized the ribo-depletion library preparation method. GLDS-168, FLT n=5 and GC n=5; GLDS-245, FLT n=10 and GC n=10. p values and FDR values are indicated.
